# Supplementary material
Source: publisher figshare collection journal article supplement (https://gsapubs.figshare.com/ndownloader/files/22410066)
Supplement: Supplementary file 1 [file 22410066]

## Sheet: Sheet1
Supplementary Data-Detritalzircon U-Pb geochronologic analyses
						Isotope ratios					Apparent ages (Ma)
Analysis	U	206Pb	U/Th	206Pb*	±	207Pb*	±	206Pb*	±	error	206Pb*	±	207Pb*	±	206Pb*	±	Best age	±	Conc
	(ppm)	204Pb		207Pb*	(%)	235U*	(%)	238U	(%)	corr.	238U*	(Ma)	235U	(Ma)	207Pb*	(Ma)	(Ma)	(Ma)	(%)
WS 121.5
WS-121.5-73	1114.38	11214.6	2.07866	20.6196	17.8575	0.0370983	18.016	0.00554794	2.38443	0.13235	35.6655	0.84807	36.9871	6.54379	123.593	423.469	35.6655	0.84807	NA
WS-121.5-64	4164.08	33562.1	2.89646	21.4779	5.45359	0.0358487	5.52902	0.00558425	0.910218	0.164626	35.8983	0.325844	35.7629	1.94292	26.6626	130.861	35.8983	0.325844	NA
WS-121.5-7	1709.5	13176.3	2.23156	21.5424	13.3673	0.0359959	13.8136	0.00562402	3.48301	0.252144	36.1532	1.2557	35.9072	4.87344	19.4713	322.232	36.1532	1.2557	NA
WS-121.5-39	2349.17	14539.9	2.55901	23.0821	9.76158	0.0337629	10.054	0.00565216	2.40718	0.239425	36.3336	0.872152	33.7162	3.33418	-148.96	242.601	36.3336	0.872152	NA
WS-121.5-79	545.679	6415.16	4.85478	18.737	39.2566	0.0421581	39.5909	0.00572902	5.13449	0.129688	36.8263	1.88545	41.9289	16.2634	344.592	921.047	36.8263	1.88545	NA
WS-121.5-85	345.454	3462.77	0.797476	35.0136	58.12	0.0258551	58.6619	0.00656572	7.95567	0.135619	42.187	3.3453	25.9192	15.0134	NA	NA	42.187	3.3453	NA
WS-121.5-45	362.265	5933.99	1.92171	25.3788	45.5313	0.0367482	46.0393	0.00676403	6.82005	0.148136	43.4569	2.95382	36.6443	16.5714	-389.915	1240.76	43.4569	2.95382	NA
WS-121.5-69	3786.06	43892.2	0.483023	21.215	3.82861	0.0452823	4.07372	0.00696739	1.39174	0.341638	44.7589	0.62077	44.9682	1.79191	56.1671	91.3366	44.7589	0.62077	NA
WS-121.5-47	943.6	11969.5	4.03853	23.9959	21.2704	0.040557	22.7511	0.00705833	8.07376	0.354873	45.3411	3.64789	40.3677	9.00419	-246.193	542.906	45.3411	3.64789	NA
WS-121.5-5	564.123	5403.7	0.862778	24.288	34.0126	0.0400748	34.7966	0.00705931	7.3448	0.211078	45.3473	3.31899	39.8971	13.6144	-276.879	886.983	45.3473	3.31899	NA
WS-121.5-93	1173.75	11950.5	2.62586	21.2801	14.2545	0.0461072	14.7647	0.0071161	3.84778	0.260606	45.7109	1.75263	45.7693	6.60776	48.8085	341.888	45.7109	1.75263	NA
WS-121.5-17	1040.4	10152.6	2.30892	22.754	20.9755	0.0445473	21.1308	0.00735153	2.55743	0.121029	47.2177	1.20315	44.254	9.15065	-113.563	521.538	47.2177	1.20315	NA
WS-121.5-61	981.149	15450.2	1.67118	22.9262	11.1467	0.044233	11.9001	0.00735489	4.16679	0.350148	47.2392	1.96116	43.9484	5.11838	-132.169	276.302	47.2392	1.96116	NA
WS-121.5-40	532.83	7487.76	1.18529	24.1354	32.1415	0.0423969	32.5121	0.00742144	4.89479	0.150553	47.665	2.3245	42.1616	13.4277	-260.871	833.243	47.665	2.3245	NA
WS-121.5-91	689.537	8158.31	0.568286	25.5933	33.4344	0.0406399	33.6105	0.0075436	3.43606	0.102232	48.4467	1.65842	40.4486	13.3285	-411.88	894.921	48.4467	1.65842	NA
WS-121.5-15	462.707	9469.58	2.11796	26.7864	36.1354	0.0393784	36.696	0.00765017	6.38947	0.174119	49.1285	3.12712	39.2169	14.1176	-532.484	995.395	49.1285	3.12712	NA
WS-121.5-27	645.24	7255.78	3.00808	22.5317	27.419	0.054828	27.5821	0.00895972	2.99436	0.108562	57.5008	1.71413	54.1988	14.5582	-89.4287	683.268	57.5008	1.71413	NA
WS-121.5-97	828.557	35155.1	1.29366	20.8893	11.808	0.0759038	12.7922	0.0114997	4.92049	0.384649	73.7087	3.60618	74.2865	9.16381	92.9425	280.495	73.7087	3.60618	NA
WS-121.5-63	167.282	5184.8	6.47157	6.49754	362.457	0.249069	362.592	0.0117373	9.86582	0.0272092	75.2229	7.37822	225.82	928.007	2389.75	425.495	75.2229	7.37822	NA
WS-121.5-30	421.3	11406.7	1.41917	22.4725	20.4427	0.0893109	20.6628	0.0145564	3.00804	0.145577	93.1603	2.78215	86.8613	17.2034	-82.9876	505.068	93.1603	2.78215	NA
WS-121.5-90	448.436	9520.34	2.42419	27.8098	19.3205	0.0723903	19.6841	0.0146008	3.76597	0.19132	93.4424	3.49363	70.9652	13.4927	-634.056	532.947	93.4424	3.49363	NA
WS-121.5-26	370.085	8587.75	0.836423	28.2264	22.7379	0.0725417	24.5163	0.0148505	9.16704	0.373917	95.0288	8.64744	71.1085	16.8383	-674.946	634.506	95.0288	8.64744	NA
WS-121.5-74	1248.56	30814.8	1.10536	20.9009	4.56487	0.0989692	4.98809	0.0150025	2.01071	0.403102	95.9942	1.91586	95.8244	4.56123	91.6236	108.194	95.9942	1.91586	NA
WS-121.5-R33	195.059	34665.6	1.05049	18.2247	6.78486	0.510849	6.90848	0.0675231	1.30107	0.188329	421.216	5.3051	419.02	23.7226	406.93	151.986	421.216	5.3051	103.511
WS-121.5-32	130.722	23276.7	1.49048	19.1276	17.6655	0.497778	17.7327	0.0690549	1.54148	0.0869288	430.459	6.41875	410.197	59.9095	297.699	405.811	430.459	6.41875	144.595
WS-121.5-4	281.759	31561.6	1.93005	17.7393	4.5584	0.567737	4.67795	0.0730438	1.05081	0.224631	454.468	4.61116	456.55	17.2029	467.068	101.019	454.468	4.61116	97.3022
WS-121.5-34	352.014	25423.8	1.41034	18.2317	3.91417	0.574571	4.4572	0.0759747	2.13212	0.478354	472.051	9.70503	460.967	16.5163	406.078	87.6153	472.051	9.70503	116.246
WS-121.5-24	120.021	8858.69	1.19484	15.3178	41.0032	0.7044	41.6039	0.0782553	7.0438	0.169306	485.701	32.955	541.415	176.338	783.469	898.484	485.701	32.955	61.9936
WS-121.5-94	194.963	28690.7	0.951975	16.3732	4.85707	0.863958	5.38522	0.102595	2.32584	0.431893	629.596	13.9511	632.281	25.3501	641.915	104.483	629.596	13.9511	98.081
WS-121.5-50	305.657	45312.8	9.66735	16.4304	1.95271	0.903178	2.02727	0.107627	0.544741	0.268707	658.95	3.4122	653.425	9.76897	634.413	42.0604	658.95	3.4122	103.868
WS-121.5-20	113.418	33930.9	2.01143	13.652	3.00238	1.75445	3.42747	0.173714	1.65325	0.482353	1032.54	15.7736	1028.8	22.1706	1020.84	60.7845	1020.84	60.7845	101.146
WS-121.5-21	156.704	38195.6	1.78322	13.6176	2.47613	1.80718	2.664	0.178485	0.982683	0.368875	1058.69	9.5942	1048.06	17.4156	1025.94	50.0954	1025.94	50.0954	103.192
WS-121.5-49	248.678	39786.4	2.35768	13.6033	1.27684	1.80728	1.60582	0.178306	0.973825	0.606436	1057.71	9.49965	1048.09	10.4974	1028.08	25.8402	1028.08	25.8402	102.883
WS-121.5-9	203.084	122047	2.41761	13.4167	1.87517	1.82892	2.27113	0.177966	1.28132	0.564177	1055.85	12.479	1055.89	14.91	1055.99	37.7827	1055.99	37.7827	99.9875
WS-121.5-95	194.921	46627.2	4.77956	13.4084	3.65719	1.77404	4.53992	0.17252	2.68996	0.592512	1025.98	25.5144	1036	29.4884	1057.22	73.6531	1057.22	73.6531	97.0447
WS-121.5-23	47.5855	15431.9	1.23614	13.0801	6.41164	2.04711	9.60999	0.1942	7.15841	0.744893	1144.09	75.0458	1131.33	65.6463	1106.92	128.258	1106.92	128.258	103.357
WS-121.5-100	277.498	107957	2.46214	12.9707	1.93746	2.0939	2.02168	0.196978	0.577444	0.285626	1159.07	6.12575	1146.8	13.8937	1123.71	38.6162	1123.71	38.6162	103.146
WS-121.5-81	85.6322	12667.6	1.61072	12.5975	4.11727	2.13337	4.35804	0.194917	1.42848	0.327781	1147.96	15.0212	1159.68	30.1372	1181.66	81.4201	1181.66	81.4201	97.1476
WS-121.5-13	143.057	32874.7	1.12039	12.5174	1.67118	2.30203	2.48014	0.208989	1.83254	0.738888	1223.43	20.4209	1212.91	17.5581	1194.23	32.9746	1194.23	32.9746	102.445
WS-121.5-99	32.389	20977.7	2.76171	11.8174	8.42525	2.70206	8.82819	0.231587	2.6367	0.298669	1342.81	31.9619	1329.02	65.5172	1306.86	163.862	1306.86	163.862	102.751
WS-121.5-54	350.389	89781.1	3.58381	11.0659	0.818677	3.26434	1.53727	0.261988	1.30115	0.846398	1500.01	17.4129	1472.6	11.9494	1433.29	15.6189	1433.29	15.6189	104.654
WS-121.5-58	277.344	4326.03	2.16333	10.8005	1.31867	2.94453	3.94606	0.230653	3.71921	0.942511	1337.92	44.9365	1393.44	29.9185	1479.46	25.0027	1479.46	25.0027	90.433
WS-121.5-44	512.707	245917	3.20122	10.6942	0.453732	3.40586	0.941454	0.264165	0.824902	0.8762	1511.11	11.112	1505.75	7.3898	1498.19	8.58116	1498.19	8.58116	100.863
WS-121.5-83	61.5033	19513.8	1.72733	10.4301	2.69831	3.44704	3.2361	0.260756	1.78646	0.552043	1493.71	23.8187	1515.19	25.4752	1545.33	50.7195	1545.33	50.7195	96.6595
WS-121.5-12	779.653	254450	29.7878	10.2029	1.37316	3.61022	3.32105	0.267149	3.02387	0.910516	1526.31	41.0973	1551.78	26.4128	1586.62	25.6683	1586.62	25.6683	96.1991
WS-121.5-59	424.195	133188	35.1958	10.1216	0.755794	3.55262	1.66746	0.260794	1.48633	0.891377	1493.9	19.8194	1539.02	13.2128	1601.55	14.1009	1601.55	14.1009	93.2789
WS-121.5-96	390.441	130529	13.8739	9.90519	0.463143	4.02699	0.911673	0.289296	0.785269	0.861349	1638.01	11.3586	1639.66	7.41565	1641.77	8.59608	1641.77	8.59608	99.7712
WS-121.5-51	482.481	14530.2	2.29651	9.88934	0.422953	4.00247	1.14663	0.287074	1.06577	0.929482	1626.89	15.324	1634.7	9.31553	1644.74	7.84714	1644.74	7.84714	98.915
WS-121.5-22	111.267	72586.1	0.978707	9.82343	1.8698	4.10191	1.99574	0.292246	0.697727	0.349608	1652.74	10.172	1654.68	16.2939	1657.13	34.6371	1657.13	34.6371	99.735
WS-121.5-60	884.998	166420	168.256	9.76459	0.26429	4.00971	1.63317	0.283966	1.61164	0.986819	1611.3	22.9774	1636.17	13.2735	1668.25	4.88873	1668.25	4.88873	96.5864
WS-121.5-11	475.57	10138.3	2.91825	9.49754	2.14184	3.81588	3.33963	0.262848	2.56236	0.767258	1504.4	34.3808	1596.1	26.875	1719.37	39.3642	1719.37	39.3642	87.4966
WS-121.5-8	434.401	44871.5	19.3349	9.47099	0.501325	4.2702	2.89484	0.293321	2.8511	0.98489	1658.1	41.6844	1687.64	23.8208	1724.52	9.20755	1724.52	9.20755	96.1487
WS-121.5-37	433.389	195590	1.05022	9.25003	0.892388	4.38837	5.38782	0.294405	5.3134	0.986188	1663.5	77.9089	1710.15	44.5829	1767.75	16.3003	1767.75	16.3003	94.1026
WS-121.5-31	71.8217	21457.8	1.58231	9.24991	2.62675	4.83616	3.77929	0.324442	2.71721	0.718973	1811.38	42.9092	1791.21	31.8094	1767.78	47.989	1767.78	47.989	102.467
WS-121.5-66	331.367	117056	2.23671	9.15986	0.489316	4.85968	2.3633	0.322846	2.31209	0.978331	1803.61	36.3758	1795.29	19.9039	1785.63	8.91715	1785.63	8.91715	101.007
WS-121.5-62	842.43	4660.18	1.65023	9.14203	0.815522	3.83092	5.43644	0.254007	5.37493	0.988684	1459.11	70.1864	1599.27	43.8013	1789.18	14.8567	1789.18	14.8567	81.5518
WS-121.5-6	265.64	94932.3	3.32766	8.57316	0.642225	5.66591	1.83591	0.352297	1.71991	0.936819	1945.56	28.8845	1926.19	15.8462	1905.39	11.5374	1905.39	11.5374	102.108
WS-121.5-3	142.774	188008	1.88016	6.23767	0.411958	10.3597	1.77992	0.468671	1.73159	0.972847	2477.73	35.6214	2467.45	16.4835	2458.99	6.9639	2458.99	6.9639	100.762
WS-121.5-16	605.622	32202.1	6.29604	6.18814	5.80598	9.26969	10.1608	0.41603	8.3386	0.820665	2242.43	157.961	2365.03	93.3872	2472.45	98.0911	2472.45	98.0911	90.6967
WS-121.5-25	157.477	166543	0.522861	5.69275	0.476192	12.2702	1.54076	0.50661	1.46533	0.951042	2642.14	31.7636	2625.3	14.4667	2612.32	7.92929	2612.32	7.92929	101.142
WS-121.5-55	169.377	96551.3	0.967695	5.65004	0.401564	12.5169	0.797285	0.512917	0.688774	0.8639	2669.07	15.0532	2644	7.49672	2624.85	6.67846	2624.85	6.67846	101.685
WS-121.5-28	465.318	36546.1	2.35073	5.63324	0.274842	12.306	1.62527	0.502776	1.60187	0.985598	2625.71	34.5485	2628.03	15.2637	2629.8	4.56874	2629.8	4.56874	99.8445
WS-121.5-86	339.035	20554.1	0.533233	5.58214	0.275479	12.7004	1.11338	0.514183	1.07876	0.968907	2674.46	23.6148	2657.69	10.4803	2644.94	4.56965	2644.94	4.56965	101.116
WS-121.5-92	283.241	63760	1.46579	5.5652	0.442384	12.6196	1.34189	0.509361	1.26687	0.944095	2653.9	27.5604	2651.69	12.6255	2649.98	7.33996	2649.98	7.33996	100.148
WS-121.5-89	81.8966	67639.2	1.03822	5.32836	1.09001	13.9844	1.87166	0.540426	1.52151	0.812921	2785.23	34.4107	2748.65	17.7381	2721.88	17.96	2721.88	17.96	102.327
WS-121.5-71	1028.81	63809.9	5.82554	5.281	0.364915	13.517	5.99495	0.517722	5.98383	0.998146	2689.51	131.602	2716.48	56.7375	2736.58	6.00214	2736.58	6.00214	98.28
WS-121.5-72	107.337	79305.5	1.44508	5.23038	0.858095	14.1706	1.56268	0.537551	1.30601	0.835746	2773.19	29.4345	2761.19	14.8224	2752.42	14.1017	2752.42	14.1017	100.755
WS-121.5-84	85.6716	57086.1	1.42846	5.12244	1.02598	14.5905	2.18044	0.542058	1.92398	0.882381	2792.06	43.5984	2788.91	20.7226	2786.63	16.8044	2786.63	16.8044	100.195
WS-121.5-14	533.483	13909.2	10.608	5.06413	0.267783	14.5402	0.899851	0.53404	0.859083	0.954695	2758.45	19.2793	2785.63	8.54918	2805.36	4.37936	2805.36	4.37936	98.3278
WS-121.5-87	329.997	198966	1.20402	4.64495	0.629522	16.8955	3.6787	0.569182	3.62444	0.985249	2904.46	84.7543	2928.92	35.2798	2945.76	10.1686	2945.76	10.1686	98.598
LTG 560
LGT-560-12	408.222	6084.35	1.8329	20.4511	43.4064	0.0354381	43.9867	0.00525637	7.1219	0.16191	33.796	2.40062	35.3603	15.2873	142.881	1064.53	33.796	2.40062	NA
LGT-560-26	477.127	717.964	2.91325	20.7216	37.7789	0.0358848	38.4729	0.00539303	7.27497	0.189093	34.6723	2.51563	35.7983	13.5335	111.987	921.072	34.6723	2.51563	NA
LGT-560-35	1178.58	6560.1	1.29786	25.0377	22.2624	0.0301402	23.0159	0.00547316	5.84123	0.253791	35.1861	2.0497	30.1517	6.83777	-354.822	581.194	35.1861	2.0497	NA
LGT-560-1	490.826	6700.26	1.02813	20.9453	37.8471	0.0368474	38.2072	0.00559746	5.23294	0.136962	35.9829	1.87772	36.7414	13.7877	86.6011	927.154	35.9829	1.87772	NA
LGT-560-94	247.539	1720.83	1.12155	18.0511	87.2232	0.0429255	87.4376	0.00561975	6.11979	0.0699904	36.1258	2.20464	42.6763	36.5576	428.316	2615.63	36.1258	2.20464	NA
LGT-560-31	1298.14	11732.2	2.50148	20.5383	8.6229	0.0624131	9.72702	0.00929693	4.50116	0.462748	59.655	2.67278	61.4742	5.80226	132.929	203.053	59.655	2.67278	NA
LGT-560-68	679.957	28587.9	1.5113	20.2546	6.06852	0.178169	6.44391	0.0261731	2.16728	0.33633	166.552	3.56343	166.483	9.89503	165.484	141.928	166.552	3.56343	NA
LGT-560-R33	62.2906	6457.26	1.65425	21.4892	20.0311	0.424665	20.54	0.0661858	4.54408	0.22123	413.136	18.1843	359.381	62.2455	25.4332	484.647	413.136	18.1843	1624.4
LGT-560-59	153.071	11179.1	1.01509	19.2461	6.71873	0.507342	7.07141	0.0708177	2.20532	0.311865	441.08	9.40193	416.66	24.1717	283.611	153.833	441.08	9.40193	155.523
LGT-560-60	127.579	15573	1.0175	18.0745	14.6318	0.561651	15.2415	0.0736262	4.26754	0.279995	457.965	18.8658	452.601	55.7154	425.421	327.933	457.965	18.8658	107.65
LGT-560-86	118.929	11581.5	1.39665	19.8349	10.2863	0.516339	10.547	0.0742787	2.33047	0.220961	461.882	10.3875	422.703	36.4824	214.245	238.777	461.882	10.3875	215.586
LGT-560-36	328.726	22894.4	1.4278	17.6677	3.77906	0.627127	4.05079	0.0803588	1.45863	0.360085	498.264	6.99406	494.305	15.854	476.027	83.6102	498.264	6.99406	104.671
LGT-560-81	138.284	60291.3	1.86302	13.7819	2.48476	1.70647	2.69687	0.170572	1.04836	0.388731	1015.26	9.84774	1010.96	17.2674	1001.63	50.4566	1001.63	50.4566	101.36
LGT-560-46	128.471	28417.9	0.447798	13.7021	3.55012	1.77729	3.73503	0.176621	1.16063	0.310743	1048.49	11.231	1037.19	24.2741	1013.42	71.9894	1013.42	71.9894	103.46
LGT-560-75	109.387	22688.8	2.01767	13.6781	3.51901	1.75322	3.90173	0.173925	1.68524	0.431922	1033.7	16.0955	1028.35	25.2332	1016.97	71.3141	1016.97	71.3141	101.646
LGT-560-25	57.7656	9124.52	2.5013	13.4806	6.90618	1.79342	7.05828	0.175344	1.4574	0.206481	1041.49	14.016	1043.07	46.0439	1046.4	139.449	1046.4	139.449	99.5307
LGT-560-57	316.249	87833.4	1.87655	13.4798	1.57784	1.82198	2.79055	0.178126	2.30165	0.824801	1056.73	22.4334	1053.4	18.2961	1046.53	31.8205	1046.53	31.8205	100.975
LGT-560-19	120.992	158109	2.40827	13.3848	4.54407	1.85795	4.99325	0.180362	2.06977	0.414513	1068.95	20.3878	1066.26	32.972	1060.77	91.4701	1060.77	91.4701	100.771
LGT-560-6	235.313	46380.9	2.49432	13.3095	2.22288	1.89486	2.91491	0.18291	1.8856	0.646882	1082.85	18.7956	1079.29	19.3757	1072.11	44.6782	1072.11	44.6782	101.002
LGT-560-13	95.9291	28079.9	1.70904	13.2351	4.3431	1.89589	5.24718	0.181986	2.94455	0.561168	1077.82	29.2258	1079.65	34.8945	1083.33	87.1563	1083.33	87.1563	99.4915
LGT-560-45	534.727	37613.4	1.32488	12.6628	2.34869	2.23401	5.15488	0.205169	4.58873	0.890172	1203.03	50.3597	1191.78	36.1722	1171.44	46.4996	1171.44	46.4996	102.696
LGT-560-52	323.696	108985	2.46082	12.5951	1.53026	2.21003	2.16895	0.201883	1.53709	0.708679	1185.43	16.6439	1184.22	15.1635	1182.04	30.2538	1182.04	30.2538	100.286
LGT-560-62	108.956	38353.8	1.10899	12.3473	2.71801	2.3522	3.52267	0.210642	2.2409	0.636136	1232.24	25.1346	1228.23	25.1035	1221.19	53.4267	1221.19	53.4267	100.905
LGT-560-88	181.768	96363.4	2.4179	11.2018	1.83365	3.0178	3.24142	0.245175	2.67293	0.824616	1413.54	33.9277	1412.13	24.726	1409.98	35.0959	1409.98	35.0959	100.253
LGT-560-5	129.017	40399.8	1.72851	11.0849	2.38757	3.18837	2.67874	0.256329	1.21458	0.453412	1471.04	15.9749	1454.35	20.7083	1430.03	45.5763	1430.03	45.5763	102.868
LGT-560-83	77.9045	10364.7	1.4229	11.0259	2.80483	3.10803	3.0121	0.248541	1.09804	0.364543	1430.95	14.0907	1434.68	23.1434	1440.2	53.4707	1440.2	53.4707	99.3576
LGT-560-28	222.571	102905	10.2775	10.8962	1.03823	3.25072	2.59106	0.256892	2.37396	0.916211	1473.92	31.2787	1469.35	20.1225	1462.73	19.7293	1462.73	19.7293	100.765
LGT-560-78	626.163	73339.5	1.95736	10.6488	0.545692	3.3573	2.62594	0.259291	2.56861	0.97817	1486.22	34.0944	1494.49	20.5469	1506.24	10.3093	1506.24	10.3093	98.6705
LGT-560-7	366.183	210929	2.74054	10.6173	0.460003	3.47628	1.31306	0.267688	1.22985	0.936627	1529.06	16.7412	1521.85	10.3545	1511.82	8.68243	1511.82	8.68243	101.14
LGT-560-14	229.107	8654.66	3.09371	10.0813	3.55572	3.38092	6.63478	0.247201	5.60153	0.844267	1424.02	71.5741	1499.98	52.0362	1608.99	66.2908	1608.99	66.2908	88.5041
LGT-560-41	93.8115	44784.8	1.2575	9.85556	1.67705	4.04909	2.5494	0.289426	1.92013	0.753172	1638.66	27.7839	1644.12	20.7621	1651.08	31.0882	1651.08	31.0882	99.2476
LGT-560-93	163.493	61517.4	1.59021	9.68631	1.33046	4.45637	3.04264	0.313068	2.73634	0.89933	1755.79	42.0577	1722.89	25.2376	1683.13	24.5612	1683.13	24.5612	104.317
LGT-560-15	503.805	70761.7	0.814433	9.67713	0.548677	4.34714	2.01799	0.305105	1.94197	0.962328	1716.57	29.2663	1702.35	16.6598	1684.88	10.1278	1684.88	10.1278	101.881
LGT-560-95	152.744	66915.2	3.24962	9.66157	0.854704	4.40291	1.8548	0.308522	1.64613	0.8875	1733.43	25.0202	1712.89	15.3487	1687.85	15.7691	1687.85	15.7691	102.701
LGT-560-33	89.8055	54578.6	1.45163	9.51918	1.72707	4.45637	2.02881	0.307666	1.06456	0.524721	1729.21	16.1462	1722.89	16.8263	1715.19	31.756	1715.19	31.756	100.817
LGT-560-66	200.05	74408.4	2.66751	9.51814	1.02314	4.38407	1.94357	0.302641	1.65247	0.850224	1704.39	24.749	1709.34	16.0706	1715.39	18.8116	1715.39	18.8116	99.3588
LGT-560-8	328.716	253720	3.36069	9.49441	0.508487	4.42302	4.23802	0.304569	4.20741	0.992776	1713.93	63.3236	1716.66	35.1111	1719.98	9.34444	1719.98	9.34444	99.648
LGT-560-96	234.378	43032.8	2.3049	9.49144	0.571639	4.44867	6.19823	0.306239	6.17181	0.995738	1722.17	93.2823	1721.45	51.429	1720.56	10.5042	1720.56	10.5042	100.094
LGT-560-90	1541.9	657115	0.899496	9.48299	0.144485	4.33467	0.934386	0.298126	0.923148	0.987972	1682.01	13.667	1699.98	7.70927	1722.19	2.65443	1722.19	2.65443	97.6668
LGT-560-91	300.884	201343	1.57192	9.4661	0.53441	4.45391	1.44879	0.305782	1.34662	0.929482	1719.92	20.3285	1722.43	12.014	1725.47	9.81404	1725.47	9.81404	99.6784
LGT-560-47	433.533	182656	3.32137	9.39679	0.495841	4.66834	0.926346	0.318156	0.782469	0.844684	1780.72	12.1747	1761.58	7.74672	1738.95	9.0886	1738.95	9.0886	102.402
LGT-560-16	148.841	68468.4	1.61376	9.35412	1.22747	4.50115	3.7208	0.305369	3.5125	0.944018	1717.88	52.9707	1731.19	30.9222	1747.29	22.4791	1747.29	22.4791	98.317
LGT-560-82	958.387	455699	0.997412	9.34861	0.221354	4.40717	2.52835	0.298817	2.51864	0.99616	1685.44	37.3548	1713.69	20.9275	1748.37	4.05338	1748.37	4.05338	96.4008
LGT-560-48	144.351	126275	1.5489	9.30248	1.02412	4.71963	1.19391	0.318424	0.613665	0.513997	1782.03	9.55432	1770.73	10.0035	1757.42	18.731	1757.42	18.731	101.4
LGT-560-80	104.674	31781	1.31682	9.1999	1.91233	4.69169	2.47116	0.313048	1.56511	0.633354	1755.69	24.0545	1765.76	20.6861	1777.68	34.8923	1777.68	34.8923	98.7632
LGT-560-42	844.763	17017.2	2.11288	9.05444	0.264912	4.17701	2.09912	0.2743	2.08234	0.992005	1562.59	28.8953	1669.52	17.1987	1806.7	4.81611	1806.7	4.81611	86.4889
LGT-560-17	157.83	96135.1	3.78013	9.01982	1.38749	4.86624	2.12695	0.318339	1.61208	0.75793	1781.61	25.094	1796.43	17.917	1813.66	25.2025	1813.66	25.2025	98.2331
LGT-560-73	160.278	24478.1	0.920228	9.01089	1.47836	4.65877	8.93998	0.304465	8.81689	0.986232	1713.41	132.678	1759.87	74.8689	1815.46	26.8475	1815.46	26.8475	94.3791
LGT-560-67	257.292	64053.8	3.73724	8.90373	0.561771	5.18287	1.65308	0.334689	1.5547	0.940486	1861.07	25.1321	1849.81	14.0713	1837.15	10.1752	1837.15	10.1752	101.302
LGT-560-64	502.948	291166	2.49654	8.67046	0.217905	5.35692	1.70726	0.336865	1.6933	0.991821	1871.57	27.5057	1878	14.6092	1885.09	3.92404	1885.09	3.92404	99.2826
LGT-560-99	239.041	84807.4	1.31996	5.84358	0.991155	11.3807	3.81361	0.482332	3.68256	0.965636	2537.41	77.2483	2554.84	35.6096	2568.69	16.5713	2568.69	16.5713	98.7824
LGT-560-50	72.8126	34988.4	0.836493	5.79286	0.981408	11.8402	1.58235	0.49745	1.24124	0.784426	2602.83	26.581	2591.84	14.8166	2583.26	16.3848	2583.26	16.3848	100.758
LGT-560-58	350.78	194863	2.35418	5.63825	0.223765	12.5878	1.05753	0.514747	1.03359	0.977358	2676.86	22.6423	2649.31	9.94805	2628.33	3.72021	2628.33	3.72021	101.847
LGT-560-54	738.939	759163	3.00844	5.63184	0.121097	12.4233	1.01374	0.507442	1.00648	0.99284	2645.7	21.841	2636.94	9.52681	2630.22	2.01293	2630.22	2.01293	100.589
LGT-560-63	745.407	217443	12.0142	5.63181	0.172735	9.9975	4.14559	0.408356	4.14199	0.999132	2207.4	77.4237	2434.55	38.2841	2630.22	2.87127	2630.22	2.87127	83.9243
LGT-560-100	437.666	356486	3.09804	5.62806	0.522059	12.388	1.41029	0.505659	1.3101	0.928961	2638.07	28.3634	2634.26	13.251	2631.33	8.677	2631.33	8.677	100.256
LGT-560-49	551.781	6257.24	0.12959	5.61028	0.48744	10.5914	6.77799	0.43096	6.76044	0.997411	2310.04	131.269	2487.96	62.9658	2636.59	8.09435	2636.59	8.09435	87.6149
LGT-560-40	294.302	146776	1.90018	5.60035	0.368723	12.3481	5.56281	0.501549	5.55057	0.997801	2620.45	119.531	2631.24	52.2984	2639.53	6.12048	2639.53	6.12048	99.277
LGT-560-71	502.68	269067	256.596	5.33602	0.151518	13.562	0.85648	0.524856	0.842971	0.984227	2719.74	18.7044	2719.62	8.09951	2719.51	2.49749	2719.51	2.49749	100.008
LGT-560-55	532.454	213781	2.16091	5.3195	0.79049	14.0555	1.85579	0.54227	1.67901	0.904743	2792.94	38.0568	2753.46	17.5935	2724.62	13.0203	2724.62	13.0203	102.507
LGT-560-32	635.243	116304	17.312	5.31042	0.228214	13.9971	1.42905	0.539095	1.41071	0.987166	2779.66	31.8536	2749.51	13.5436	2727.44	3.75888	2727.44	3.75888	101.915
LGT-560-53	209.511	137287	1.6874	5.30121	0.353023	13.6436	3.33397	0.52457	3.31523	0.994378	2718.53	73.537	2725.29	31.5509	2730.3	5.80963	2730.3	5.80963	99.5691
LGT-560-61	166.723	112810	1.72511	5.30107	0.338256	14.0241	0.960285	0.539186	0.898738	0.935908	2780.04	20.2955	2751.34	9.10182	2730.34	5.56643	2730.34	5.56643	101.82
LGT-560-21	280.251	122997	1.2325	5.27964	0.347904	12.8149	3.7457	0.490702	3.72951	0.995677	2573.71	79.1441	2666.14	35.2944	2737	5.72197	2737	5.72197	94.0339
LGT-560-34	305.879	36953.1	1.64028	5.27797	0.284718	13.8402	1.80969	0.529797	1.78715	0.987546	2740.6	39.8989	2738.84	17.1387	2737.52	4.68191	2737.52	4.68191	100.112
EF 15-60
EF15-65_62-97	236.078	3501.17	0.856328	12.2666	25.8507	0.0555029	27.6467	0.00493786	9.80204	0.354547	31.7532	3.10481	54.8483	14.7625	1234.08	515.685	31.7532	3.10481	NA
EF15-65_62-38	299.587	4360.64	1.15303	21.5635	59.6049	0.0320151	60.3357	0.00500695	9.36175	0.155161	32.1963	3.00663	31.9981	19.0075	17.1213	1567.5	32.1963	3.00663	NA
EF15-65_62-53	340.326	4149.46	1.72344	17.4587	21.4476	0.0398777	21.984	0.00504942	4.82639	0.219541	32.4688	1.56313	39.7047	8.5604	502.256	477.087	32.4688	1.56313	NA
EF15-65_62-66	1750.33	7584.66	1.15959	20.9712	6.93118	0.0335711	7.12731	0.00510608	1.66053	0.232981	32.8322	0.543802	33.5278	2.35062	83.6171	164.625	32.8322	0.543802	NA
EF15-65_62-12	927.058	8123.45	2.62527	21.8459	10.1055	0.0329015	10.3357	0.00521296	2.16934	0.209887	33.5176	0.725222	32.8698	3.34295	-14.1842	244.76	33.5176	0.725222	NA
EF15-65_62-54	173.479	2645.27	1.30019	26.9428	99.7678	0.0282769	100.261	0.00552553	9.93271	0.0990685	35.5218	3.51858	28.3135	28.0023	-548.115	#VALUE!	35.5218	3.51858	NA
EF15-65_62-57	1167.37	46770.2	1.32519	21.3189	7.71664	0.0466198	7.88459	0.00720832	1.61869	0.205298	46.3011	0.746787	46.2667	3.56609	44.4591	184.677	46.3011	0.746787	NA
EF15-65_62-56	700.21	5522.77	0.755048	20.2921	12.2638	0.0505425	12.4069	0.00743844	1.87894	0.151444	47.7738	0.894323	50.0652	6.06095	161.166	287.757	47.7738	0.894323	NA
EF15-65_62-40	579.586	30776.7	2.19511	21.4875	8.38839	0.0930092	8.54242	0.0144948	1.61488	0.189043	92.7685	1.48738	90.3027	7.38109	25.6093	201.493	92.7685	1.48738	NA
EF15-65_62-77	779.31	29428.1	2.08167	21.5589	4.83545	0.0932943	5.25816	0.0145875	2.06559	0.392835	93.3577	1.91449	90.5675	4.55601	17.6333	116.222	93.3577	1.91449	NA
EF15-65_62-46	519.094	55726.9	1.63288	21.4251	7.85688	0.096335	8.11515	0.0149694	2.03104	0.250277	95.784	1.93103	93.3877	7.2406	32.5729	188.451	95.784	1.93103	NA
EF15-65_62-85	606.034	48070.6	1.25161	20.6383	2.53583	0.164135	3.20724	0.0245682	1.96367	0.61226	156.463	3.03542	154.316	4.59159	121.479	59.75	156.463	3.03542	NA
EF15-65_62-79	390.223	22530.3	0.875381	20.9953	3.66109	0.170209	3.98977	0.025918	1.58578	0.39746	164.95	2.58256	159.6	5.89253	80.899	86.9138	164.95	2.58256	NA
EF15-65_62-67	316.953	10411.3	2.46135	12.1658	15.5937	0.313405	18.2755	0.0276532	9.53048	0.521491	175.844	16.5323	276.817	44.3078	1250.24	307.006	175.844	16.5323	NA
EF15-65_62-39	254.002	40437.6	2.23167	18.7066	3.74541	0.422771	3.89568	0.0573585	1.07155	0.275061	359.541	3.7472	358.031	11.7545	348.23	84.7042	359.541	3.7472	NA
EF15-65_62-35	573.548	13327.1	1.42662	17.7298	4.22226	0.510347	4.31183	0.0656246	0.874326	0.202774	409.741	3.471	418.682	14.7949	468.249	93.5256	409.741	3.471	87.505
EF15-65_62-74	1294.57	40674.4	10.9763	17.509	3.19019	0.525671	3.43806	0.0667536	1.28178	0.37282	416.567	5.17061	428.933	12.0287	495.895	70.3374	416.567	5.17061	84.0032
EF15-65_62-86	223.188	31214	0.836583	18.5517	3.91356	0.502244	7.96028	0.0675767	6.93182	0.870801	421.54	28.2857	413.22	27.0293	366.996	88.2141	421.54	28.2857	114.862
EF15-65_62-84	327.571	19237.7	1.62735	17.9791	3.30444	0.520318	3.45886	0.0678476	1.02195	0.29546	423.175	4.18577	425.364	12.0204	437.219	73.5987	423.175	4.18577	96.788
EF15-65_62-102	92.7653	26642.4	0.724083	17.2413	9.93902	0.571136	10.0648	0.0714181	1.58619	0.157598	444.694	6.81591	458.749	37.1667	529.79	218.241	444.694	6.81591	83.9377
EF15-65_62-73	189.589	88875.2	1.48798	18.2502	2.55655	0.561125	3.21221	0.0742724	1.94482	0.605447	461.844	8.66786	452.259	11.724	403.797	57.2483	461.844	8.66786	114.375
EF15-65_62-9	715.756	88528.8	1.96702	17.8171	1.11207	0.580763	1.77557	0.075047	1.38417	0.779567	466.491	6.22895	464.951	6.62377	457.378	24.6907	466.491	6.22895	101.992
EF15-65_62-41	189.317	12523.1	3.37691	17.0795	3.0316	0.612862	4.3356	0.0759164	3.09949	0.714894	471.702	14.0983	485.364	16.7295	550.398	66.1802	471.702	14.0983	85.7021
EF15-65_62-2	379.119	74774.3	4.6487	17.6065	1.88326	0.613705	2.5632	0.0783667	1.73877	0.678359	486.366	8.14565	485.894	9.89834	483.689	41.5921	486.366	8.14565	100.553
EF15-65_62-94	383.397	90610.1	3.19513	17.5833	1.1212	0.637005	2.11576	0.0812345	1.79425	0.848042	503.487	8.69006	500.45	8.35985	486.581	24.7696	503.487	8.69006	103.475
EF15-65_62-23	255.844	57977.2	1.21073	16.86	3.30353	0.742754	3.39153	0.0908241	0.767592	0.226326	560.409	4.11998	564.011	14.6779	578.545	71.8165	560.409	4.11998	96.8653
EF15-65_62-82	184.502	87338	2.47292	13.7783	0.884542	1.75248	1.6073	0.175125	1.34201	0.834949	1040.29	12.8926	1028.08	10.3913	1002.17	17.941	1002.17	17.941	103.803
EF15-65_62-103	57.5921	25603.8	2.08772	13.693	2.02945	1.74165	2.83153	0.172964	1.97456	0.697349	1028.42	18.7699	1024.07	18.2661	1014.77	41.1392	1014.77	41.1392	101.345
EF15-65_62-95	135.37	67597.3	2.14254	13.6313	1.19045	1.74668	1.88013	0.172683	1.45524	0.77401	1026.88	13.8141	1025.94	12.1407	1023.91	24.1072	1023.91	24.1072	100.29
EF15-65_62-33	66.5477	51602.9	1.70429	13.599	2.84675	1.71631	3.08647	0.169279	1.19262	0.386401	1008.14	11.1302	1014.65	19.8045	1028.71	57.5824	1028.71	57.5824	98.0005
EF15-65_62-3	412.742	110955	3.22672	13.5654	0.404547	1.75789	1.10167	0.172951	1.0247	0.930137	1028.35	9.74003	1030.07	7.13022	1033.71	8.17382	1033.71	8.17382	99.4819
EF15-65_62-59	115.007	24259	2.73364	13.4951	1.50218	1.78459	2.42838	0.174668	1.908	0.785711	1037.78	18.2893	1039.85	15.8037	1044.2	30.3242	1044.2	30.3242	99.3856
EF15-65_62-16	434.078	234935	4.97624	13.3967	0.588775	1.83019	1.07407	0.177825	0.898309	0.836364	1055.08	8.74293	1056.35	7.05258	1058.98	11.8511	1058.98	11.8511	99.6323
EF15-65_62-63	241.543	16144.9	1.35272	13.0245	5.27076	1.89485	5.60903	0.178992	1.91842	0.342023	1061.47	18.7753	1079.28	37.296	1115.42	105.272	1115.42	105.272	95.163
EF15-65_62-80	145.071	145756	2.34805	12.9759	1.54595	2.06357	2.04307	0.194203	1.33574	0.653788	1144.1	14.0029	1136.8	13.9744	1122.91	30.8234	1122.91	30.8234	101.887
EF15-65_62-27	180.72	123697	1.70243	12.8229	1.63701	2.08127	1.85384	0.193559	0.870011	0.469303	1140.63	9.09521	1142.65	12.7152	1146.53	32.5436	1146.53	32.5436	99.4853
EF15-65_62-34	238.97	86164.3	2.11925	12.7664	0.982416	2.14853	1.64419	0.198933	1.31842	0.801863	1169.59	14.1021	1164.58	11.3929	1155.25	19.5123	1155.25	19.5123	101.241
EF15-65_62-45	338.483	171764	1.23227	12.7644	0.5431	2.13075	1.00343	0.197257	0.843752	0.840867	1160.57	8.96145	1158.83	6.9344	1155.56	10.7757	1155.56	10.7757	100.433
EF15-65_62-70	163.791	77763.5	1.69895	12.7355	1.01173	2.15646	1.54396	0.199184	1.16628	0.755382	1170.93	12.4879	1167.13	10.7108	1160.06	20.0802	1160.06	20.0802	100.937
EF15-65_62-91	22.6935	5172.01	0.966073	12.5638	9.10221	2.19877	10.3542	0.200355	4.93545	0.476663	1177.23	53.1063	1180.65	72.3898	1186.96	180.14	1186.96	180.14	99.1805
EF15-65_62-78	52.8427	42592.6	2.31819	12.5583	3.59879	2.18626	3.68018	0.199128	0.769702	0.209148	1170.63	8.23963	1176.68	25.6456	1187.82	71.0802	1187.82	71.0802	98.553
EF15-65_62-98	101.362	48188.9	1.04457	12.5277	1.09355	2.11872	1.39311	0.192505	0.863069	0.619528	1134.93	8.98143	1154.92	9.61001	1192.61	21.5626	1192.61	21.5626	95.1639
EF15-65_62-31	87.8791	46462.3	2.06607	12.5194	2.13348	2.17094	2.92753	0.19712	2.00467	0.684765	1159.83	21.2792	1171.78	20.354	1193.92	42.1177	1193.92	42.1177	97.1448
EF15-65_62-58	45.9763	51090.8	1.72317	12.4223	2.70608	2.40194	3.08163	0.216402	1.47429	0.478412	1262.84	16.9077	1243.18	22.096	1209.26	53.2925	1209.26	53.2925	104.43
EF15-65_62-81	647.451	18005.6	2.852	12.3515	0.612011	2.27577	2.84495	0.203866	2.77835	0.976587	1196.05	30.3301	1204.8	20.0713	1220.54	12.0293	1220.54	12.0293	97.9935
EF15-65_62-69	95.7661	42964.6	1.30579	12.3396	1.79405	2.25901	6.07464	0.202171	5.80368	0.955394	1186.97	62.9198	1199.6	42.7799	1222.4	35.2567	1222.4	35.2567	97.1021
EF15-65_62-99	814.035	189313	1.81285	12.0651	0.152337	2.40245	1.0833	0.210225	1.07254	0.990063	1230.02	12.0102	1243.33	7.76696	1266.46	2.9889	1266.46	2.9889	97.1228
EF15-65_62-6	271.315	85220.7	1.68268	11.4415	0.205015	2.89251	0.79883	0.240026	0.772074	0.966506	1386.83	9.63396	1379.96	6.02747	1369.33	3.9469	1369.33	3.9469	101.278
EF15-65_62-72	508.314	57735.3	2.36004	11.3287	0.37941	2.81576	1.13557	0.231353	1.07031	0.942532	1341.58	12.9634	1359.74	8.50879	1388.38	7.28271	1388.38	7.28271	96.6295
EF15-65_62-71	106.498	94861.8	0.949123	11.1339	1.51953	3.05701	1.95613	0.246856	1.23185	0.629739	1422.24	15.7219	1421.99	14.9675	1421.59	29.0372	1421.59	29.0372	100.046
EF15-65_62-68	289.729	150978	1.99961	10.9558	0.432466	3.23942	1.51071	0.257401	1.44749	0.95815	1476.53	19.1017	1466.65	11.7217	1452.34	8.2294	1452.34	8.2294	101.666
EF15-65_62-100	155.876	167749	1.01079	10.8369	0.969967	3.28336	1.74447	0.258061	1.44995	0.831167	1479.91	19.1731	1477.11	13.5786	1473.08	18.4065	1473.08	18.4065	100.464
EF15-65_62-5	389.728	21035.2	1.53487	10.7134	0.413124	3.22049	6.9173	0.250236	6.90495	0.998215	1439.69	89.0972	1462.1	53.645	1494.8	7.8167	1494.8	7.8167	96.3136
EF15-65_62-50	509.513	122906	0.894363	10.6834	0.398787	3.33942	0.782642	0.258749	0.673422	0.860447	1483.44	8.92372	1490.32	6.11558	1500.1	7.54008	1500.1	7.54008	98.8891
EF15-65_62-20	318.137	210294	2.72791	10.5927	0.514277	3.4603	0.892071	0.265839	0.728909	0.817098	1519.64	9.86806	1518.22	7.02726	1516.21	9.70139	1516.21	9.70139	100.226
EF15-65_62-4	262.73	48134.6	4.5172	10.5811	0.805888	3.41705	1.40723	0.262228	1.15362	0.819781	1501.23	15.4498	1508.32	11.0543	1518.28	15.1992	1518.28	15.1992	98.8768
EF15-65_62-11	233.076	524702	1.22841	10.1571	0.532379	3.27625	1.29275	0.24135	1.17803	0.911265	1393.71	14.7649	1475.43	10.0571	1595.01	9.94103	1595.01	9.94103	87.3795
EF15-65_62-87	516.707	79811.3	1.28428	10.1377	0.442026	3.87152	2.16622	0.284655	2.12065	0.97896	1614.77	30.2916	1607.76	17.4821	1598.59	8.25002	1598.59	8.25002	101.012
EF15-65_62-14	155.532	137114	1.38221	10.053	1.06605	3.95356	1.92632	0.288258	1.60444	0.832907	1632.82	23.1432	1624.72	15.6122	1614.23	19.8554	1614.23	19.8554	101.151
EF15-65_62-93	528.773	33400.1	2.39009	9.87708	0.25377	3.73335	1.41419	0.26744	1.39123	0.983768	1527.79	18.9242	1578.55	11.3262	1647.04	4.70684	1647.04	4.70684	92.76
EF15-65_62-64	544.723	67633.5	2.4562	9.84839	0.282687	4.12758	1.19757	0.294822	1.16373	0.971741	1665.58	17.0813	1659.78	9.78879	1652.43	5.23955	1652.43	5.23955	100.796
EF15-65_62-60	828.629	1.75505e+06	2.16312	9.67855	0.220922	4.22711	1.11794	0.296724	1.09589	0.98028	1675.04	16.1656	1679.3	9.17999	1684.61	4.07801	1684.61	4.07801	99.4323
EF15-65_62-21	165.471	99775.3	1.52226	9.59722	0.581001	4.34492	0.959244	0.302431	0.763275	0.795704	1703.35	11.4254	1701.93	7.91787	1700.17	10.702	1700.17	10.702	100.187
EF15-65_62-89	218.137	282106	2.35037	9.5184	0.331584	4.3893	1.73128	0.303011	1.69923	0.981488	1706.22	25.4732	1710.33	14.3182	1715.34	6.09705	1715.34	6.09705	99.4682
EF15-65_62-24	206.852	191926	2.32013	9.39015	0.531711	3.97977	2.44778	0.271037	2.38933	0.976122	1546.06	32.8449	1630.08	19.8658	1740.25	9.74466	1740.25	9.74466	88.8417
EF15-65_62-37	750.144	12337.3	1.68071	9.36661	0.472797	4.05919	1.67732	0.275753	1.6093	0.959451	1569.94	22.4239	1646.14	13.6656	1744.84	8.65977	1744.84	8.65977	89.9759
EF15-65_62-76	143.43	127006	1.0799	9.36201	0.552027	4.60928	0.958386	0.312969	0.783435	0.817452	1755.3	12.0384	1750.95	7.9966	1745.74	10.1101	1745.74	10.1101	100.547
EF15-65_62-36	771.178	141931	2.42931	9.34972	0.150789	4.52356	3.8168	0.306745	3.81382	0.999219	1724.67	57.7134	1735.31	31.7492	1748.15	2.76128	1748.15	2.76128	98.6569
EF15-65_62-44	131.28	156571	1.45974	9.3207	0.870293	4.68518	2.35898	0.316718	2.19257	0.929458	1773.68	33.9983	1764.6	19.742	1753.84	15.9242	1753.84	15.9242	101.131
EF15-65_62-19	500.738	105618	2.6657	9.3044	0.199606	4.59886	1.32548	0.310339	1.31037	0.988596	1742.38	20.0063	1749.06	11.0553	1757.04	3.65118	1757.04	3.65118	99.1654
EF15-65_62-55	671.898	8133.24	3.58686	9.18486	0.510108	4.58992	4.92673	0.305757	4.90025	0.994625	1719.79	73.9723	1747.44	41.0984	1780.66	9.30183	1780.66	9.30183	96.582
EF15-65_62-51	193.501	155716	2.17537	9.11777	0.439481	4.86294	1.2958	0.321578	1.219	0.940729	1797.43	19.1212	1795.86	10.9136	1794.02	8.00231	1794.02	8.00231	100.19
EF15-65_62-7	90.896	51333.2	1.27103	9.10234	1.10142	4.98689	1.93332	0.329216	1.58889	0.821848	1834.58	25.3688	1817.1	16.353	1797.1	20.0445	1797.1	20.0445	102.086
EF15-65_62-43	99.941	102399	1.48803	9.06264	0.93735	4.96895	1.98883	0.326602	1.75409	0.881969	1821.89	27.8388	1814.05	16.8126	1805.05	17.0431	1805.05	17.0431	100.933
EF15-65_62-101	205.895	307177	1.74394	9.03193	0.494683	5.11502	2.01143	0.335063	1.94965	0.969286	1862.88	31.543	1838.6	17.0854	1811.22	8.98656	1811.22	8.98656	102.852
EF15-65_62-65	117.676	107546	1.54515	8.71432	0.416136	5.41522	1.28912	0.342254	1.2201	0.946465	1897.5	20.0553	1887.27	11.0495	1876	7.50203	1876	7.50203	101.146
EF15-65_62-92	177.292	95946.5	2.23678	7.76752	6.62725	5.56764	6.76689	0.313655	1.36762	0.202105	1758.67	21.0502	1911.11	58.312	2080.84	116.777	2080.84	116.777	84.5173
EF15-65_62-47	66.2498	15562.3	0.615835	7.75764	1.39172	6.16583	3.00504	0.346913	2.66334	0.886291	1919.84	44.2213	1999.62	26.2604	2083.08	24.4902	2083.08	24.4902	92.1636
EF15-65_62-52	400.663	88580.6	4.5754	7.30942	1.57229	6.17058	3.1697	0.327121	2.75225	0.8683	1824.41	43.7331	2000.29	27.703	2187.19	27.3494	2187.19	27.3494	83.4136
EF15-65_62-90	55.763	70098.5	0.824798	5.73177	0.501599	11.8903	1.53502	0.494289	1.45076	0.945104	2589.21	30.9359	2595.8	14.3782	2600.94	8.35843	2600.94	8.35843	99.5488
EF15-65_62-1	1229.77	2507.04	1.91813	5.70358	1.87776	10.7227	3.21273	0.443557	2.60685	0.811412	2366.55	51.6367	2499.39	29.8473	2609.16	31.2763	2609.16	31.2763	90.7016
EF15-65_62-49	515.361	6520.37	0.864202	5.64951	0.628457	11.4338	2.80478	0.468491	2.73347	0.974574	2476.94	56.2177	2559.19	26.1946	2625.01	10.4518	2625.01	10.4518	94.3594
EF15-65_62-13	184.704	3998.15	0.609311	5.42165	0.404898	11.429	2.08683	0.449405	2.04717	0.980997	2392.61	40.9192	2558.8	19.4869	2693.24	6.68729	2693.24	6.68729	88.8375
EF15-65_62-42	138.463	281804	1.31675	5.32001	0.470604	12.7754	1.63438	0.492931	1.56517	0.957649	2583.34	33.3142	2663.23	15.3917	2724.46	7.75345	2724.46	7.75345	94.8202
EF15-65_62-30	324.025	20499.4	1.00334	5.15411	0.285227	13.919	0.742043	0.520309	0.685035	0.923174	2700.49	15.1134	2744.21	7.02966	2776.53	4.67675	2776.53	4.67675	97.2614
EF15-65_62-28	171.062	405274	1.10279	4.88685	0.480565	15.559	2.11797	0.551453	2.06273	0.973918	2831.21	47.2648	2850.11	20.2094	2863.48	7.81833	2863.48	7.81833	98.8732
EF15-65_62-83	360.973	726167	1.40112	4.54139	0.158685	17.7918	0.911492	0.586013	0.897573	0.984729	2973.24	21.3791	2978.54	8.76285	2982.12	2.55502	2982.12	2.55502	99.7021
EF15-65_62-62	47.9538	123234	3.87211	4.47681	1.88372	18.4541	3.32977	0.599184	2.74572	0.824597	3026.55	66.3211	3013.72	32.0827	3005.16	30.2707	3005.16	30.2707	100.712
LG 22-WB-8
LAG 22 -8M-66	123.438	318.131	1.12352	6.8531	25.5831	0.0907476	29.803	0.00451046	15.288	0.512968	29.0109	4.42522	88.1995	25.182	2298.63	447.705	29.0109	4.42522	NA
LAG 22 -8M-43	80.8778	217.924	0.859896	10.1389	36.9557	0.0613732	43.1912	0.00451304	22.3553	0.517589	29.0275	6.4746	60.4798	25.3645	1598.36	715.609	29.0275	6.4746	NA
LAG 22-8M-111	150.843	437.499	0.465609	15.3525	28.0091	0.0422439	30.2183	0.00470371	11.3416	0.375323	30.251	3.42291	42.0124	12.437	778.713	600.015	30.251	3.42291	NA
LAG 22 -8M-8	695.089	1660.96	2.46896	17.0225	15.2273	0.0384885	16.1687	0.00475175	5.43673	0.33625	30.5592	1.65749	38.3473	6.08472	557.672	333.781	30.5592	1.65749	NA
LAG 22 -8M-80	261.218	501.864	0.444996	19.3056	26.936	0.0343043	27.4489	0.00480319	5.28174	0.192421	30.8892	1.62759	34.2479	9.24417	276.549	626.996	30.8892	1.62759	NA
LAG 22 -8M-100	399.111	2851.72	0.628857	16.5431	14.9805	0.0406408	15.521	0.00487616	4.06015	0.26159	31.3573	1.27006	40.4495	6.15484	619.635	324.941	31.3573	1.27006	NA
LAG 22 -8M-29	227.366	929.205	0.793244	10.4597	19.1616	0.0653352	20.3536	0.00495638	6.86307	0.337192	31.872	2.182	64.2631	12.6752	1540.01	363.75	31.872	2.182	NA
LAG 22 -8M-12	187.499	778.666	1.03553	9.29806	21.7649	0.073654	23.6959	0.00496692	9.36928	0.395397	31.9396	2.98511	72.161	16.5072	1758.29	402.998	31.9396	2.98511	NA
LAG 22 -8M-30	573.193	1505.2	0.570058	22.2583	14.797	0.030844	15.0707	0.00497924	2.85944	0.189735	32.0186	0.913283	30.8452	4.57873	-59.5893	362.396	32.0186	0.913283	NA
LAG 22 -8M-19	516.573	2371.32	0.742559	16.3389	12.4704	0.0420771	12.9258	0.00498617	3.40075	0.263098	32.063	1.08768	41.85	5.29953	646.423	268.869	32.063	1.08768	NA
LAG 22 -8M-55	150.862	646.137	0.813612	9.38165	24.4802	0.0733777	28.1174	0.00499278	13.8313	0.491912	32.1054	4.42955	71.8997	19.5195	1741.91	455.732	32.1054	4.42955	NA
LAG 22 -8M-37	150.854	419.234	1.07057	12.0494	31.5524	0.0574804	34.0483	0.00502324	12.7959	0.375816	32.3008	4.12283	56.7489	18.7941	1269.02	631.75	32.3008	4.12283	NA
LAG 22-8M-133	682.4	6258.17	1.2271	17.5523	10.7069	0.040436	10.9253	0.00514757	2.17326	0.198921	33.0982	0.717468	40.2497	4.3114	490.482	236.792	33.0982	0.717468	NA
LAG 22 -8M-15	610.804	3118.9	0.460955	20.2898	11.7491	0.035027	12.2066	0.00515442	3.3106	0.271214	33.1422	1.09439	34.9571	4.19447	161.454	275.572	33.1422	1.09439	NA
LAG 22 -8M-13	214.514	427.157	0.758753	13.9335	29.1705	0.0513623	29.865	0.00519045	6.40338	0.214411	33.3733	2.13149	50.8573	14.8155	979.385	606.836	33.3733	2.13149	NA
LAG 22 -8M-27	378.673	1289.77	0.634483	14.0444	16.1532	0.0540668	16.7069	0.00550724	4.26549	0.255313	35.4046	1.50604	53.4658	8.70161	963.251	331.959	35.4046	1.50604	NA
LAG 22-8M-132	94.4929	901.769	0.985388	8.15582	22.6953	0.100164	26.9006	0.00592485	14.4418	0.536856	38.0814	5.48341	96.9276	24.8733	1994.56	409.034	38.0814	5.48341	NA
LAG 22 -8M-72	252.069	826.185	0.518301	16.4407	19.7175	0.0501688	20.5877	0.00598209	5.92232	0.287662	38.4481	2.27025	49.704	9.98683	633.062	428.384	38.4481	2.27025	NA
LAG 22 -8M-68	528.572	1197.79	0.547221	19.5237	14.7089	0.0467429	14.8957	0.00661876	2.35166	0.157875	42.5267	0.996792	46.3861	6.7542	250.709	340.021	42.5267	0.996792	NA
LAG 22 -8M-18	274.437	20419.2	1.83751	17.8603	10.9943	0.0850547	11.235	0.0110176	2.31298	0.205873	70.6354	1.62487	82.8861	8.94255	451.954	244.777	70.6354	1.62487	NA
LAG 22-8M-124	464.776	3376.35	1.06832	22.8571	8.64633	0.0709663	8.73742	0.0117645	1.25832	0.144015	75.396	0.943194	69.616	5.87887	-124.715	213.796	75.396	0.943194	NA
LAG 22 -8M-89	67.0436	428.324	0.446459	14.3742	26.1465	0.137584	27.5342	0.0143434	8.63093	0.313462	91.8063	7.86759	130.89	33.8257	915.675	546.911	91.8063	7.86759	NA
LAG 22-8M-125	537.685	4161.76	1.17609	23.5838	6.99684	0.0839595	7.12071	0.0143609	1.32238	0.18571	91.918	1.20688	81.8607	5.60034	-202.576	175.576	91.918	1.20688	NA
LAG 22 -8M-23	920.5	2893.31	1.40775	23.7688	4.80334	0.0862531	4.88107	0.0148689	0.867645	0.177757	95.1458	0.819465	84.0069	3.93542	-222.2	120.938	95.1458	0.819465	NA
LAG 22-8M-110	602.831	11901.1	1.59976	22.7379	5.12461	0.0974791	5.19734	0.0160753	0.866493	0.166718	102.804	0.883726	94.4467	4.68738	-111.818	126.252	102.804	0.883726	NA
LAG 22-8M-135	1389.92	1723.6	2.72582	19.8782	7.02042	0.113867	7.17718	0.0164162	1.49185	0.20786	104.967	1.55326	109.496	7.44998	209.168	162.91	104.967	1.55326	NA
LAG 22 -8M-82	543.722	1325.51	1.44246	16.0072	5.22951	0.149735	5.71097	0.0173836	2.29507	0.401871	111.099	2.52795	141.678	7.55221	690.28	111.59	111.099	2.52795	NA
LAG 22 -8M-97	305.787	4615.25	1.60532	20.5084	6.24387	0.163433	6.36554	0.0243092	1.23863	0.194583	154.833	1.89495	153.704	9.07978	136.306	146.815	154.833	1.89495	NA
LAG 22 -8M-47	552.034	11925.5	0.671691	22.426	3.74805	0.151896	3.87223	0.0247056	0.972766	0.251216	157.327	1.5119	143.584	5.18475	-77.9134	91.7049	157.327	1.5119	NA
LAG 22 -8M-10	685.877	5384.53	1.02321	21.0945	3.08258	0.167596	3.18791	0.0256408	0.812691	0.254929	163.207	1.30972	157.331	4.64633	69.7424	73.3437	163.207	1.30972	NA
LAG 22 -8M-11	456.618	7421.3	0.658509	21.3877	6.04509	0.16595	6.18298	0.0257419	1.29848	0.210008	163.843	2.10065	155.898	8.93585	36.7493	144.79	163.843	2.10065	NA
LAG 22 -8M-36	287.321	1170.96	1.2379	21.8275	11.1414	0.169341	11.2101	0.026808	1.23898	0.110524	170.539	2.08525	158.847	16.4853	-12.1483	269.88	170.539	2.08525	NA
LAG 22-8M-119	218.918	2417.36	1.01995	22.3826	8.62751	0.176375	8.88234	0.0286316	2.11234	0.237813	181.978	3.79024	164.936	13.523	-73.1761	211.207	181.978	3.79024	NA
LAG 22 -8M-95	595.553	2604.67	1.1418	17.0919	6.47336	0.377258	6.55646	0.0467658	1.04056	0.158708	294.635	2.99685	325.018	18.2376	548.825	141.502	294.635	2.99685	NA
LAG 22 -8M-54	294.654	8832.56	2.13261	18.2725	3.00892	0.468569	3.19635	0.062097	1.07846	0.337404	388.366	4.06471	390.2	10.3557	401.065	67.4374	388.366	4.06471	NA
LAG 22-8M-107	467.326	1368.67	2.60312	19.2824	2.65908	0.446933	2.74465	0.0625033	0.680006	0.247757	390.831	2.57872	375.129	8.60838	279.294	60.8844	390.831	2.57872	NA
LAG 22 -8M-96	109.8	3248.15	1.12956	15.8904	9.31905	0.54969	9.69504	0.0633509	2.67378	0.275789	395.972	10.2688	444.794	34.932	705.878	198.633	395.972	10.2688	NA
LAG 22 -8M-31	210.208	7603.23	1.10461	18.9551	3.81611	0.46604	3.87539	0.064069	0.675266	0.174245	400.324	2.62103	388.45	12.5096	318.308	86.7752	400.324	2.62103	125.766
LAG 22 -8M-88	200.147	8507.1	6.7928	17.6603	4.44699	0.514601	4.57115	0.0659125	1.05817	0.231489	411.483	4.21814	421.538	15.7711	476.923	98.3603	411.483	4.21814	86.2787
LAG 22-8M-112	119.239	11112	2.75682	18.8949	5.87779	0.482794	6.00176	0.0661614	1.21354	0.202197	412.988	4.85459	399.988	19.8447	325.579	133.52	412.988	4.85459	126.847
LAG 22 -8M-91	91.2884	7490.43	0.754416	19.9049	7.73765	0.472459	7.90348	0.068206	1.61053	0.203774	425.338	6.62908	392.886	25.7551	206.077	179.719	425.338	6.62908	206.398
LAG 22 -8M-49	190.494	449.998	0.654716	20.2314	7.37658	0.545622	7.42395	0.0800601	0.837333	0.112788	496.482	4.00115	442.125	26.6166	168.169	172.483	496.482	4.00115	295.228
LAG 22 -8M-40	273.182	11377.9	1.34402	17.228	2.1465	0.657811	2.2536	0.082193	0.686487	0.304618	509.199	3.36109	513.274	9.07997	531.484	47.0006	509.199	3.36109	95.807
LAG 22-8M-118	445.389	532.9	0.840795	19.6954	5.54845	0.654061	5.58068	0.0934288	0.598949	0.107325	575.784	3.29912	510.975	22.4106	230.532	128.207	575.784	3.29912	249.764
LAG 22 -8M-32	60.9527	2860.17	1.22568	20.5073	9.54228	0.652426	9.8254	0.097037	2.34167	0.238328	597.021	13.3524	509.97	39.4101	136.439	224.614	597.021	13.3524	437.574
LAG 22 -8M-76	291.922	235.886	2.54868	16.8448	3.83444	0.852349	5.02169	0.104132	3.2426	0.645718	638.577	19.714	625.937	23.4667	580.501	83.3387	638.577	19.714	110.004
LAG 22 -8M-33	223.412	17537.5	2.10334	14.3903	1.42269	1.41324	1.60699	0.147498	0.747259	0.465004	886.921	6.19188	894.523	9.55593	913.336	29.2774	913.336	29.2774	97.1079
LAG 22-8M-123	693.711	1107.8	1.23574	13.7586	1.15187	1.51478	2.4646	0.151155	2.17886	0.884064	907.432	18.4432	936.37	15.075	1005.08	23.3567	1005.08	23.3567	90.2848
LAG 22 -8M-93	180.789	18397.6	2.09725	13.7567	1.26434	1.67376	1.3434	0.166996	0.454079	0.338006	995.539	4.18877	998.615	8.53921	1005.36	25.6566	1005.36	25.6566	99.0234
LAG 22 -8M-22	55.4109	10311.2	1.77631	13.4458	3.25932	1.91398	3.4266	0.186647	1.05754	0.308626	1103.19	10.723	1085.97	22.8569	1051.62	65.6926	1051.62	65.6926	104.904
LAG 22-8M-129	92.1127	1691.26	1.49257	12.9493	6.86936	2.06539	15.1879	0.193976	13.5457	0.89187	1142.88	141.886	1137.41	104.272	1126.96	137.036	1126.96	137.036	101.412
LAG 22 -8M-78	165.825	17622.2	1.07032	12.7043	0.942765	2.00228	1.06716	0.184491	0.500029	0.46856	1091.46	5.02061	1116.28	7.22671	1164.92	18.6985	1164.92	18.6985	93.6945
LAG 22 -8M-1	149.772	21009.5	2.21469	12.2835	1.0567	2.50514	1.19145	0.223179	0.550397	0.461957	1298.65	6.47378	1273.52	8.64652	1231.37	20.729	1231.37	20.729	105.464
LAG 22 -8M-35	239.095	2645.67	1.0257	11.7295	0.819979	2.41064	1.41578	0.205073	1.15415	0.815206	1202.52	12.6613	1245.77	10.161	1321.33	15.8871	1321.33	15.8871	91.0078
LAG 22-8M-116	198.701	32812.3	1.7026	11.0702	0.72749	3.22555	1.20628	0.258976	0.962219	0.797676	1484.6	12.7595	1463.32	9.34997	1432.55	13.8806	1432.55	13.8806	103.634
LAG 22 -8M-61	298.652	44683.2	1.25002	10.9355	0.414875	3.13308	0.728293	0.24849	0.598572	0.821884	1430.68	7.67996	1440.85	5.6058	1455.87	7.89092	1455.87	7.89092	98.27
LAG 22-8M-106	177.189	556.95	1.6438	10.469	2.12733	3.46709	2.33272	0.263249	0.957104	0.410295	1506.45	12.8575	1519.76	18.3857	1538.34	40.0204	1538.34	40.0204	97.9267
LAG 22 -8M-74	367.09	8103.6	1.45456	10.4176	0.452969	3.48352	1.98149	0.263199	1.92902	0.97352	1506.19	25.9102	1523.49	15.6335	1547.59	8.51084	1547.59	8.51084	97.3246
LAG 22 -8M-83	627.86	872.03	0.850148	10.4009	0.721559	2.86181	1.49983	0.21588	1.31486	0.87667	1260.07	15.0494	1371.92	11.286	1550.59	13.5521	1550.59	13.5521	81.2635
LAG 22 -8M-70	149.217	12778.3	2.42365	10.3765	0.744019	3.50902	1.46536	0.26408	1.26242	0.861512	1510.68	17.0014	1529.25	11.5797	1555.01	13.9658	1555.01	13.9658	97.1492
LAG 22-8M-105	231.948	10504.5	1.41265	10.1425	0.568879	3.16621	0.757302	0.232909	0.499884	0.660085	1349.73	6.08755	1448.96	5.8439	1597.69	10.6189	1597.69	10.6189	84.4796
LAG 22-8M-128	148.218	668.872	0.72698	10.0169	6.79575	3.96035	6.86718	0.287717	0.987908	0.143859	1630.11	14.2292	1626.11	55.7269	1620.93	126.607	1620.93	126.607	100.567
LAG 22-8M-108	311.212	6969.33	1.44787	9.89383	0.312292	4.07753	0.576257	0.292591	0.484299	0.840423	1654.46	7.06694	1649.82	4.69887	1643.9	5.79463	1643.9	5.79463	100.643
LAG 22 -8M-44	307.172	38091.6	1.28031	9.81006	0.347884	3.74609	0.495949	0.266532	0.353471	0.712718	1523.17	4.79518	1581.28	3.97476	1659.66	6.44033	1659.66	6.44033	91.7764
LAG 22-8M-113	163.791	18026.5	1.34898	9.60594	0.69402	4.02567	1.02035	0.280464	0.747963	0.733046	1593.7	10.5611	1639.4	8.29913	1698.49	12.7868	1698.49	12.7868	93.83
LAG 22 -8M-90	307.403	59756.2	1.37912	9.60552	0.371718	4.08396	0.845475	0.284512	0.759377	0.898166	1614.05	10.8427	1651.1	6.89631	1698.57	6.84769	1698.57	6.84769	95.0237
LAG 22 -8M-21	706.316	20532.9	8.4343	9.5638	0.190849	4.18618	0.848592	0.290367	0.826852	0.974382	1643.36	11.9945	1671.32	6.95514	1706.59	3.51141	1706.59	3.51141	96.2953
LAG 22 -8M-58	158.735	30029.2	3.79964	9.47489	0.619094	4.2033	0.844711	0.288844	0.574681	0.680329	1635.75	8.30249	1674.66	6.92877	1723.76	11.3717	1723.76	11.3717	94.8941
LAG 22 -8M-63	260.95	41117	0.944435	9.4693	0.334473	4.01104	0.856623	0.275469	0.788626	0.920622	1568.5	10.9798	1636.43	6.96235	1724.85	6.1428	1724.85	6.1428	90.9358
LAG 22 -8M-17	124.804	10207.6	2.16943	9.46357	0.867226	3.66875	1.7643	0.251809	1.53645	0.870855	1447.8	19.9238	1564.6	14.0782	1725.96	15.9252	1725.96	15.9252	83.8839
LAG 22 -8M-50	212.684	3892.39	1.36499	9.4557	0.683165	4.3059	0.827843	0.295295	0.467557	0.564789	1667.94	6.87132	1694.49	6.82165	1727.49	12.5427	1727.49	12.5427	96.5528
LAG 22 -8M-81	134.242	26319	2.94487	9.44408	0.684658	4.18025	0.891664	0.286326	0.571233	0.640637	1623.14	8.19674	1670.16	7.30617	1729.74	12.5648	1729.74	12.5648	93.8371
LAG 22 -8M-46	511.199	42034.8	1.26907	9.42741	0.316012	3.67056	1.42486	0.250971	1.38938	0.975096	1443.48	17.9687	1564.99	11.3706	1732.98	5.79782	1732.98	5.79782	83.2945
LAG 22-8M-102	370.265	50478.6	0.499655	9.42422	0.289371	4.55227	0.983862	0.311152	0.940345	0.955769	1746.37	14.3855	1740.58	8.19088	1733.61	5.30862	1733.61	5.30862	100.736
LAG 22 -8M-75	818.091	906.753	1.23059	9.39991	2.3415	3.58225	3.33638	0.244219	2.37672	0.712365	1408.59	30.0733	1545.61	26.4899	1738.34	42.931	1738.34	42.931	81.0308
LAG 22 -8M-20	436.163	53469.9	1.72722	9.39848	0.198761	4.21942	0.61499	0.287613	0.581985	0.946333	1629.59	8.38019	1677.8	5.04815	1738.62	3.64228	1738.62	3.64228	93.7289
LAG 22 -8M-62	169.226	24370.7	1.36004	9.37726	0.569106	4.27281	0.998326	0.290595	0.820227	0.821603	1644.5	11.9056	1688.14	8.21454	1742.76	10.4269	1742.76	10.4269	94.3619
LAG 22-8M-109	224.689	8105.85	1.38245	9.31864	0.505405	4.08106	0.986064	0.275819	0.846693	0.858659	1570.27	11.7999	1650.53	8.04198	1754.24	9.24812	1754.24	9.24812	89.5128
LAG 22 -8M-16	116.818	12604.3	1.7727	9.21612	0.714534	4.52792	1.07538	0.302653	0.803671	0.747335	1704.45	12.0369	1736.11	8.94419	1774.46	13.0403	1774.46	13.0403	96.0547
LAG 22 -8M-52	229.129	13262.9	1.44234	9.0256	0.469581	4.41929	0.790927	0.289286	0.636443	0.804679	1637.96	9.20568	1715.96	6.54911	1812.49	8.52913	1812.49	8.52913	90.3705
LAG 22 -8M-56	166.816	15439	1.63166	8.68738	2.49375	4.51666	2.95385	0.28458	1.58317	0.535968	1614.39	22.6095	1734.04	24.5609	1881.58	44.9302	1881.58	44.9302	85.7994
LAG 22-8M-103	37.0125	8703	1.98403	8.60004	1.64612	5.70905	1.8592	0.356093	0.86423	0.46484	1963.63	14.6292	1932.74	16.0655	1899.76	29.5898	1899.76	29.5898	103.362
LAG 22 -8M-73	166.087	37986.5	0.587489	7.40688	0.313207	6.72395	0.761411	0.361209	0.694009	0.911477	1987.9	11.8718	2075.77	6.73039	2164.12	5.46208	2164.12	5.46208	91.8572
LAG 22 -8M-24	231.434	20769.7	1.47606	5.95207	0.225122	9.25579	0.517289	0.399558	0.465734	0.900336	2167.01	8.57128	2363.65	4.74035	2537.89	3.77577	2537.89	3.77577	85.3862
LAG 22 -8M-4	553.866	974.639	1.30979	5.78785	0.52868	9.2955	1.28352	0.390202	1.16958	0.911229	2123.76	21.1622	2367.58	11.7673	2584.7	8.82662	2584.7	8.82662	82.1667
LAG 22 -8M-64	374.344	29384.3	4.58556	5.68574	0.14324	11.196	0.582349	0.461689	0.564458	0.969278	2447.01	11.4933	2539.58	5.42829	2614.37	2.38466	2614.37	2.38466	93.5984
LAG 22 -8M-65	908.421	27299.2	3.42204	5.55462	0.0595309	11.6199	0.925678	0.468119	0.923762	0.99793	2475.31	18.9878	2574.28	8.6546	2653.14	0.987419	2653.14	0.987419	93.2974
LAG 22 -8M-79	47.2915	16534.7	0.379479	5.46233	0.584308	12.4905	0.865291	0.49483	0.638211	0.737567	2591.54	13.6191	2642.01	8.13492	2680.89	9.66283	2680.89	9.66283	96.6672
LAG 22 -8M-57	79.5271	24110	0.584493	5.03	0.358002	14.174	1.05732	0.51708	0.994862	0.940932	2686.79	21.8591	2761.42	10.0286	2816.42	5.84888	2816.42	5.84888	95.3973
LAG 22-8M-126	141.144	10228	1.36518	4.68956	0.300651	14.3701	0.97909	0.488754	0.931786	0.951686	2565.28	19.7198	2774.46	9.29496	2930.32	4.85856	2930.32	4.85856	87.5428
LAG 22 -8M-92	143.062	42797.2	1.54717	4.55217	0.140594	17.0865	0.888983	0.564118	0.877795	0.987415	2883.62	20.4086	2939.7	8.52771	2978.3	2.26449	2978.3	2.26449	96.821
PB 4583
C-PB-4583-78	185.755	1676.15	1.76275	19.4757	59.7439	0.0295204	60.791	0.00416979	11.234	0.184798	26.8243	3.00719	29.5406	17.7011	256.414	1508.13	26.8243	3.00719	NA
C-PB-4583-77	256.202	315.91	0.872145	20.2863	58.1694	0.0288976	58.7478	0.00425171	8.2237	0.139983	27.3502	2.24443	28.9261	16.7552	161.85	1483.52	27.3502	2.24443	NA
C-PB-4583-42	282.469	3200.81	1.30853	38.0326	61.161	0.0154682	61.3702	0.00426672	5.06273	0.0824949	27.4465	1.38659	15.5859	9.49232	NA	NA	27.4465	1.38659	NA
C-PB-4583-59	273.497	1998.58	0.923636	15.5113	31.8396	0.038585	32.2787	0.00434075	5.30635	0.164391	27.9217	1.47842	38.4416	12.1771	757.044	688.382	27.9217	1.47842	NA
C-PB-4583-51	333.107	4244.33	1.1812	18.81	15.4591	0.0324154	16.4752	0.0044222	5.69634	0.345753	28.4445	1.61673	32.3918	5.25243	335.751	352.174	28.4445	1.61673	NA
C-PB-4583-60	418.09	2494.58	1.01547	22.0466	25.9939	0.0291029	26.3933	0.00465346	4.57436	0.173315	29.9285	1.36586	29.1287	7.57894	-36.3342	640.144	29.9285	1.36586	NA
C-PB-4583-32	261.684	3883.38	1.68524	22.9625	28.0023	0.028387	30.4746	0.00472756	12.0238	0.394552	30.404	3.64711	28.4222	8.54165	-136.083	704.569	30.404	3.64711	NA
C-PB-4583-11	266.608	3284.8	1.31991	19.4387	27.9858	0.0339977	28.7147	0.00479309	6.42882	0.223886	30.8244	1.97691	33.9469	9.58688	260.788	654.152	30.8244	1.97691	NA
C-PB-4583-22	586.213	4153.46	1.60182	17.5321	40.7463	0.03778	41.9913	0.0048039	10.1493	0.241701	30.8938	3.12802	37.6543	15.5231	492.993	935.097	30.8938	3.12802	NA
C-PB-4583-84	2311.56	11851	3.23148	20.961	3.25542	0.0327667	3.83821	0.00498132	2.03325	0.529739	32.0319	0.649673	32.7373	1.23649	84.7701	77.2438	32.0319	0.649673	NA
C-PB-4583-31	307.998	4704.39	0.496086	21.7855	20.8822	0.0320246	21.6345	0.00505999	5.65547	0.26141	32.5365	1.83546	32.0074	6.81672	-7.49888	508.781	32.5365	1.83546	NA
C-PB-4583-41	506.487	5539.55	1.80191	22.8823	25.2219	0.0313726	26.1295	0.00520653	6.82712	0.26128	33.4764	2.27955	31.3658	8.0706	-127.433	631.487	33.4764	2.27955	NA
C-PB-4583-1	92.9587	1941.18	0.633795	-0.465515	4481.98	-1.58985	4482.01	0.0053677	14.8632	0.00331619	34.5099	5.11556	#NUM!	#NUM!	NA	NA	34.5099	5.11556	NA
C-PB-4583-49	217.043	4204.31	1.57106	18.5309	43.395	0.0404283	44.4068	0.00543351	9.42521	0.212247	34.9318	3.28349	40.2421	17.5225	369.522	1022.85	34.9318	3.28349	NA
C-PB-4583-58	925.205	28558.2	1.31153	20.4423	7.23445	0.037187	7.53109	0.00551339	2.09287	0.277897	35.444	0.739761	37.0739	2.74172	143.919	169.91	35.444	0.739761	NA
C-PB-4583-87	321.836	5820.07	3.24747	22.1505	26.6799	0.0399946	26.8996	0.00642515	3.4315	0.127567	41.2867	1.41223	39.8187	10.5042	-47.762	659.002	41.2867	1.41223	NA
C-PB-4583-62	315.96	4848.53	1.16468	20.9711	24.4368	0.0489288	24.5718	0.00744192	2.57224	0.104683	47.7961	1.22488	48.5043	11.6387	83.6265	587.38	47.7961	1.22488	NA
C-PB-4583-66	288.336	7356.14	1.56911	24.4893	15.0451	0.0542871	15.6078	0.00964209	4.15317	0.266095	61.8592	2.55683	53.678	8.16055	-297.918	386.14	61.8592	2.55683	NA
C-PB-4583-103	223.504	7056.66	0.874575	26.8034	20.6559	0.0526324	20.8104	0.0102316	2.53052	0.121599	65.6219	1.65215	52.0831	10.5658	-534.188	558.605	65.6219	1.65215	NA
C-PB-4583-100	69.7108	2359.81	1.75721	-0.453739	8807.74	-3.24052	8807.75	0.010664	14.4537	0.00164102	68.3804	9.83129	#NUM!	#NUM!	NA	NA	68.3804	9.83129	NA
C-PB-4583-36	430.285	25532.6	0.693842	22.627	12.5576	0.0719979	12.927	0.0118153	3.0684	0.237364	75.7201	2.30981	70.5936	8.81587	-99.7964	309.547	75.7201	2.30981	NA
C-PB-4583-50	120.147	3273.51	1.3015	30.2801	48.7475	0.0538499	49.2853	0.0118261	7.2613	0.147332	75.7886	5.47102	53.2569	25.5768	-873.087	1478.69	75.7886	5.47102	NA
C-PB-4583-9	4556.21	99184.1	0.434974	21.228	1.03638	0.0779831	2.19988	0.0120063	1.94046	0.882075	76.9363	1.48404	76.2469	1.61591	54.6757	24.7148	76.9363	1.48404	NA
C-PB-4583-35	352.387	20491.1	1.44021	21.1704	10.9413	0.0937985	11.3674	0.014402	3.08297	0.271212	92.1791	2.82163	91.0357	9.89836	61.1659	261.344	92.1791	2.82163	NA
C-PB-4583-37	298.164	8684.76	2.1531	21.0975	11.1159	0.101432	11.3475	0.0155205	2.2812	0.20103	99.2832	2.24749	98.0977	10.6112	69.3821	265.149	99.2832	2.24749	NA
C-PB-4583-61	309.508	15144.9	2.19423	21.5485	11.0547	0.111091	11.168	0.0173618	1.58725	0.142125	110.961	1.74615	106.963	11.3384	18.8416	266.188	110.961	1.74615	NA
C-PB-4583-5	270.705	21332.5	0.971695	20.2436	11.3093	0.177443	11.5105	0.0260522	2.14292	0.186171	165.793	3.50752	165.858	17.6152	166.757	264.938	165.793	3.50752	NA
C-PB-4583-47	109.49	10599.6	1.15411	22.8479	11.8132	0.157359	13.1553	0.0260758	5.78893	0.440045	165.941	9.48363	148.389	18.1636	-123.723	292.424	165.941	9.48363	NA
C-PB-4583-99	271.615	40512.9	2.12976	18.7215	2.00243	0.414256	2.10529	0.056248	0.650013	0.308753	352.767	2.23142	351.935	6.26163	346.43	45.2742	352.767	2.23142	NA
C-PB-4583-12	342.938	132950	17.5717	18.0969	2.38296	0.486929	3.35962	0.0639099	2.36824	0.704912	399.36	9.1708	402.816	11.1716	422.66	53.1974	399.36	9.1708	NA
C-PB-4583-30	297.434	77058.8	8.21123	18.5858	3.19795	0.492286	4.00054	0.0663586	2.40363	0.600827	414.18	9.64229	406.467	13.4011	362.86	72.1172	414.18	9.64229	114.143
C-PB-4583-67	185.557	34047.8	4.56606	17.0568	2.65681	0.680546	3.08283	0.0841888	1.56371	0.507233	521.077	7.82751	527.104	12.6768	553.288	57.9665	521.077	7.82751	94.1783
C-PB-4583-43	125.955	83221.2	1.86782	16.9845	4.40655	0.756407	4.99433	0.0931769	2.35066	0.470666	574.299	12.916	571.935	21.8426	562.531	96.0584	574.299	12.916	102.092
C-PB-4583-44	363.395	14170.2	0.60165	16.2561	1.26088	0.857327	2.81569	0.101079	2.51759	0.89413	620.732	14.8987	628.663	13.1977	657.278	27.0409	620.732	14.8987	94.4397
C-PB-4583-82	86.8556	24485.8	1.68253	16.3247	3.80334	0.878639	4.54958	0.104029	2.49665	0.548766	637.977	15.1653	640.248	21.609	648.289	81.7114	637.977	15.1653	98.4092
C-PB-4583-28	215.455	86142.5	7.76304	13.7506	1.16745	1.6769	1.45402	0.167234	0.866745	0.596102	996.854	8.00529	999.805	9.24885	1006.26	23.6681	1006.26	23.6681	99.0651
C-PB-4583-3	188.157	126559	2.68336	13.2539	1.15166	1.91622	2.19795	0.184199	1.87207	0.851737	1089.87	18.7717	1086.75	14.6657	1080.52	23.0869	1080.52	23.0869	100.865
C-PB-4583-27	151.342	103925	2.07609	12.967	1.37464	2.07306	2.03806	0.194962	1.50468	0.73829	1148.2	15.8255	1139.94	13.9609	1124.28	27.3868	1124.28	27.3868	102.127
C-PB-4583-20	162.325	98842.5	3.02911	12.886	0.817404	2.15311	2.23599	0.201226	2.08123	0.930785	1181.9	22.4749	1166.05	15.5046	1136.76	16.2454	1136.76	16.2454	103.971
C-PB-4583-93	173.696	83047.4	3.63231	12.7794	0.772356	2.1867	1.21292	0.202674	0.935222	0.77105	1189.67	10.1598	1176.81	8.45123	1153.23	15.3123	1153.23	15.3123	103.16
C-PB-4583-96	105.388	84270.4	3.04973	12.7232	1.12564	2.14202	1.71603	0.19766	1.29526	0.7548	1162.74	13.7804	1162.48	11.8793	1161.97	22.3202	1161.97	22.3202	100.066
C-PB-4583-70	84.2825	4517.14	1.26492	12.581	3.54529	2.10118	5.0746	0.191725	3.63077	0.715479	1130.71	37.6552	1149.19	34.9252	1184.25	70.071	1184.25	70.071	95.4792
C-PB-4583-95	104.559	34820.8	1.49069	12.469	1.14391	2.27597	1.65159	0.205825	1.19132	0.721314	1206.54	13.1087	1204.87	11.6514	1201.9	22.5266	1201.9	22.5266	100.386
C-PB-4583-85	128.157	87424.3	1.24322	12.4331	1.28048	2.25909	2.10505	0.203709	1.67081	0.793714	1195.22	18.2278	1199.62	14.817	1207.59	25.2159	1207.59	25.2159	98.9754
C-PB-4583-26	22.8746	20314.2	1.53807	12.3779	5.55016	2.15263	5.85102	0.193248	1.85208	0.316539	1138.94	19.3358	1165.9	40.5872	1216.35	109.237	1216.35	109.237	93.6366
C-PB-4583-53	316.909	345296	2.13212	12.1325	0.449874	2.42736	1.13211	0.213591	1.03889	0.917656	1247.92	11.7869	1250.74	8.14146	1255.61	8.79001	1255.61	8.79001	99.3877
C-PB-4583-98	62.4384	45733.2	1.38286	11.9351	1.80652	2.53276	2.23332	0.21924	1.31309	0.587956	1277.86	15.2211	1281.5	16.2592	1287.58	35.1715	1287.58	35.1715	99.2453
C-PB-4583-74	35.2784	26013.4	2.15152	11.8003	2.80596	2.63666	3.27835	0.225656	1.69533	0.517129	1311.69	20.1211	1310.93	24.139	1309.66	54.4478	1309.66	54.4478	100.156
C-PB-4583-34	39.859	18809.5	0.850148	11.4554	3.35412	2.88982	4.07112	0.240093	2.30736	0.566763	1387.18	28.7979	1379.26	30.7198	1367	64.593	1367	64.593	101.476
C-PB-4583-101	124.492	93724.6	3.33447	11.4009	0.432466	2.91075	1.48022	0.240683	1.41563	0.956368	1390.25	17.7033	1384.71	11.1871	1376.17	8.31498	1376.17	8.31498	101.023
C-PB-4583-83	540.632	593312	1.73495	11.2805	0.437969	2.96382	1.48583	0.242482	1.41981	0.95557	1399.59	17.8624	1398.39	11.2812	1396.56	8.39738	1396.56	8.39738	100.217
C-PB-4583-18	189.553	145465	2.43134	11.2588	0.372819	2.94907	1.35748	0.24081	1.30528	0.961547	1390.91	16.3302	1394.61	10.2936	1400.26	7.14462	1400.26	7.14462	99.3323
C-PB-4583-54	77.2497	31643.3	1.24132	11.2252	1.74409	3.0432	2.20065	0.247755	1.34201	0.609825	1426.89	17.1778	1418.53	16.82	1405.98	33.3997	1405.98	33.3997	101.487
C-PB-4583-76	51.4348	49069.6	1.74998	11.1257	1.86929	3.0469	2.1548	0.245859	1.07188	0.497438	1417.08	13.6358	1419.46	16.4745	1423	35.7151	1423	35.7151	99.584
C-PB-4583-38	135.637	99403.4	3.37472	11.1192	0.856516	3.137	1.4075	0.252982	1.11688	0.793524	1453.83	14.5368	1441.81	10.8373	1424.11	16.3612	1424.11	16.3612	102.087
C-PB-4583-63	146.406	153103	1.70346	11.0458	0.498589	3.05656	1.6942	0.244867	1.61917	0.955716	1411.95	20.5315	1421.88	12.9626	1436.76	9.50766	1436.76	9.50766	98.2733
C-PB-4583-97	144.195	77844.2	1.43144	11.0446	1.26589	3.0861	3.35041	0.247206	3.10206	0.925874	1424.05	39.6364	1429.24	25.6993	1436.96	24.1396	1436.96	24.1396	99.1013
C-PB-4583-86	52.9027	18759.3	1.13706	11.0281	3.56408	3.13756	3.78412	0.250952	1.27158	0.336031	1443.39	16.4442	1441.95	29.1448	1439.82	67.9563	1439.82	67.9563	100.248
C-PB-4583-40	568.655	7485.24	1.93038	11.0228	0.31333	2.81385	1.2412	0.224952	1.201	0.967612	1307.99	14.2178	1359.23	9.29866	1440.74	5.97169	1440.74	5.97169	90.7855
C-PB-4583-7	114.029	91099.6	1.44845	11.022	0.715377	3.10567	1.4797	0.248264	1.29527	0.875365	1429.52	16.6069	1434.1	11.3656	1440.88	13.6341	1440.88	13.6341	99.2117
C-PB-4583-72	170.713	260776	2.15501	11.0204	0.646394	3.16185	1.80727	0.252718	1.68772	0.933851	1452.48	21.9485	1447.89	13.9423	1441.15	12.3189	1441.15	12.3189	100.786
C-PB-4583-8	104.642	64322.2	1.56546	11.0181	0.912207	3.21478	1.16781	0.256896	0.729155	0.624376	1473.94	9.60717	1460.73	9.04464	1441.55	17.384	1441.55	17.384	102.247
C-PB-4583-21	162.601	108271	1.8164	11.0116	0.871987	3.13269	1.22816	0.250188	0.864874	0.704205	1439.44	11.1574	1440.75	9.45324	1442.67	16.615	1442.67	16.615	99.7764
C-PB-4583-90	98.1817	85962.8	1.608	11.0109	1.0756	3.20384	1.59918	0.255854	1.18341	0.740011	1468.59	15.542	1458.09	12.3758	1442.79	20.4945	1442.79	20.4945	101.788
C-PB-4583-57	67.2697	107702	1.20006	10.9961	1.82582	3.15512	1.96947	0.251623	0.738379	0.374912	1446.84	9.56919	1446.25	15.1861	1445.36	34.779	1445.36	34.779	100.102
C-PB-4583-4	453.477	3580.05	5.39306	10.9502	0.547515	2.20587	1.67282	0.175187	1.58068	0.944921	1040.63	15.19	1182.91	11.6878	1453.32	10.4173	1453.32	10.4173	71.6036
C-PB-4583-45	71.8419	45299	1.02876	10.8691	0.907703	3.17492	2.62248	0.250279	2.46039	0.938189	1439.91	31.7499	1451.08	20.2528	1467.45	17.2379	1467.45	17.2379	98.1233
C-PB-4583-94	240.157	2945.95	0.763906	10.8648	3.87426	2.93595	13.2131	0.23135	12.6324	0.956047	1341.57	153.029	1391.23	100.403	1468.2	73.5916	1468.2	73.5916	91.3749
C-PB-4583-89	324.786	12651.7	2.25723	10.6156	4.08857	3.3234	5.36378	0.255874	3.47184	0.647276	1468.7	45.6	1486.56	41.8894	1512.13	77.21	1512.13	77.21	97.1274
C-PB-4583-55	194.961	119411	2.82159	10.4355	0.425317	3.5147	1.73808	0.266012	1.68524	0.969598	1520.53	22.8268	1530.53	13.74	1544.36	7.99468	1544.36	7.99468	98.457
C-PB-4583-33	79.9966	95749.4	1.5483	9.71175	0.907685	4.28152	1.32242	0.301574	0.961724	0.727243	1699.11	14.3646	1689.81	10.8857	1678.28	16.7671	1678.28	16.7671	101.241
C-PB-4583-19	214.828	136431	2.22558	9.68288	0.322176	4.31295	1.00393	0.302885	0.950828	0.947108	1705.6	14.2493	1695.84	8.27525	1683.78	5.94769	1683.78	5.94769	101.296
C-PB-4583-29	110.32	46717.3	1.89645	9.6759	0.649185	4.26486	2.7512	0.299292	2.67351	0.971762	1687.8	39.7003	1686.61	22.633	1685.11	11.9827	1685.11	11.9827	100.159
C-PB-4583-23	204.031	91785.7	2.67217	9.65948	0.677775	4.31736	1.10131	0.302462	0.868049	0.788195	1703.51	12.9948	1696.68	9.07975	1688.25	12.5054	1688.25	12.5054	100.904
C-PB-4583-6	201.079	288659	2.01639	9.6295	0.265187	4.51557	1.00858	0.315366	0.973089	0.964814	1767.06	15.0397	1733.84	8.38438	1693.98	4.88927	1693.98	4.88927	104.314
C-PB-4583-13	90.4329	113495	1.30369	9.60886	0.968612	4.18221	1.48212	0.291458	1.12182	0.7569	1648.81	16.3206	1670.54	12.1458	1697.93	17.8482	1697.93	17.8482	97.1069
C-PB-4583-79	181.268	49270.3	2.06107	9.5555	0.752119	4.36653	1.36521	0.302613	1.13935	0.83456	1704.25	17.0628	1706.03	11.2795	1708.19	13.8405	1708.19	13.8405	99.7698
C-PB-4583-68	494.419	362267	7.68116	9.53221	0.315312	4.2831	2.65003	0.296108	2.63121	0.992896	1671.98	38.7514	1690.12	21.8181	1712.68	5.79979	1712.68	5.79979	97.6238
C-PB-4583-56	52.7332	35592	2.49435	9.5294	1.46822	4.45306	2.1344	0.307768	1.54919	0.725821	1729.71	23.5027	1722.27	17.6998	1713.22	27.0038	1713.22	27.0038	100.963
C-PB-4583-24	167.524	210161	2.8652	9.50139	0.459771	4.40121	1.55756	0.30329	1.48815	0.955439	1707.6	22.3246	1712.57	12.8878	1718.63	8.45061	1718.63	8.45061	99.3584
C-PB-4583-91	788.213	480218	1.94127	9.49727	0.152348	4.3115	1.64975	0.296979	1.6427	0.995727	1676.31	24.2477	1695.56	13.5983	1719.43	2.79986	1719.43	2.79986	97.4925
C-PB-4583-48	142.661	111465	3.77541	9.2582	0.415053	4.70878	1.52657	0.316179	1.46906	0.962329	1771.04	22.7498	1768.8	12.786	1766.14	7.58355	1766.14	7.58355	100.278
C-PB-4583-25	327.341	192018	1.93457	9.19687	0.272533	4.84986	1.03375	0.323495	0.997176	0.964622	1806.77	15.7122	1793.59	8.7024	1778.28	4.97022	1778.28	4.97022	101.603
C-PB-4583-52	157.594	111730	5.4785	9.19563	0.530388	4.73251	1.48675	0.315625	1.38892	0.934202	1768.33	21.4801	1773.01	12.4634	1778.52	9.67425	1778.52	9.67425	99.4268
C-PB-4583-2	256.227	290573	2.70539	9.16326	0.386522	4.82051	1.35138	0.320362	1.29492	0.958223	1791.5	20.254	1788.48	11.3647	1784.95	7.04405	1784.95	7.04405	100.367
C-PB-4583-102	217.998	12701.1	1.97407	9.13529	0.729006	4.85352	1.19521	0.321572	0.947144	0.792449	1797.4	14.8567	1794.23	10.063	1790.52	13.2782	1790.52	13.2782	100.384
C-PB-4583-46	287.962	392803	3.10139	9.12696	0.170814	4.84257	0.757172	0.320554	0.737653	0.974221	1792.43	11.5429	1792.32	6.37238	1792.18	3.11097	1792.18	3.11097	100.014
C-PB-4583-15	329.295	725788	7.38098	8.32532	0.590719	6.18969	2.29359	0.373739	2.21622	0.966264	2046.97	38.8687	2002.99	20.0522	1957.92	10.5443	1957.92	10.5443	104.548
C-PB-4583-65	397.772	8680.81	1.35706	5.71991	0.387899	12.2058	5.31778	0.506355	5.30361	0.997336	2641.05	114.938	2620.36	49.9473	2604.39	6.46408	2604.39	6.46408	101.408
C-PB-4583-81	1026.74	75596.9	3.4293	5.6412	0.153401	12.259	0.930902	0.501562	0.918176	0.986329	2620.51	19.7709	2624.44	8.73955	2627.45	2.55058	2627.45	2.55058	99.7356
C-PB-4583-88	298.544	8272.56	2.26455	5.50191	0.19218	11.5403	6.29922	0.460498	6.29629	0.999535	2441.76	127.993	2567.85	58.9268	2668.94	3.18279	2668.94	3.18279	91.4881
C-PB-4583-17	156.353	202048	1.6145	5.4842	1.62405	13.4269	5.10345	0.534056	4.83815	0.948015	2758.52	108.589	2710.15	48.264	2674.28	26.8821	2674.28	26.8821	103.15
C-PB-4583-80	191.154	177795	1.12949	5.45262	0.313451	13.5286	2.95313	0.535002	2.93644	0.994351	2762.49	65.9784	2717.28	27.9287	2683.83	5.18056	2683.83	5.18056	102.931
C-PB-4583-92	91.6596	127784	0.946626	5.32409	0.35206	13.9778	1.47419	0.539738	1.43154	0.971065	2782.35	32.3489	2748.2	13.9702	2723.2	5.80103	2723.2	5.80103	102.172
C-PB-4583-75	1283.79	151953	14.7709	4.15422	1.07817	15.3945	3.98129	0.463825	3.83252	0.962633	2456.43	78.2869	2839.97	37.9772	3124.72	17.1556	3124.72	17.1556	78.6127
BP 98
BP-98-16	145.928	1237.9	0.825716	26.976	88.1137	0.0190277	88.8326	0.00372273	11.2779	0.126956	23.9537	2.69646	19.1389	16.8439	-551.421	3115.63	23.9537	2.69646	NA
BP-98-30	141.685	2146.35	0.670168	23.1485	75.4223	0.0222763	76.7005	0.00373993	13.944	0.181798	24.0642	3.34925	22.3707	16.9724	-156.085	2212.9	24.0642	3.34925	NA
BP-98-11	506.99	7157.81	1.19307	27.0328	27.0274	0.0201178	27.2431	0.00394431	3.421	0.125573	25.3767	0.866429	20.2246	5.45533	-557.09	739.04	25.3767	0.866429	NA
BP-98-28	921.79	10331	1.23716	22.4178	15.2163	0.024648	15.5734	0.0040075	3.31573	0.21291	25.7824	0.853166	24.7237	3.80383	-77.0242	374.013	25.7824	0.853166	NA
BP-98-47	768.373	11110.2	0.745936	25.1716	24.7981	0.0222333	25.0704	0.00405894	3.68509	0.146989	26.1126	0.960327	22.328	5.53668	-368.624	650.851	26.1126	0.960327	NA
BP-98-96	126.876	1744.44	0.835504	6.18332	205.698	0.0909293	206.184	0.00407779	14.1547	0.0686509	26.2336	3.70576	88.3687	176.248	2473.76	162.324	26.2336	3.70576	NA
BP-98-34	349.276	1976.42	0.541053	29.1274	38.0943	0.0193833	39.183	0.00409476	9.17224	0.234087	26.3426	2.41128	19.4931	7.56529	-762.547	1104.65	26.3426	2.41128	NA
BP-98-77	1086.71	15086.2	0.668682	21.8958	14.3681	0.0291143	14.5012	0.00462344	1.96017	0.135173	29.7359	0.581533	29.14	4.16562	-19.7052	349.151	29.7359	0.581533	NA
BP-98-63	408.381	11200.5	1.18675	22.8399	31.6863	0.0280135	31.887	0.00464046	3.57205	0.112022	29.8451	1.06362	28.0533	8.82314	-122.858	799.173	29.8451	1.06362	NA
BP-98-56	345.673	7683.32	1.49841	22.168	56.9203	0.0307668	57.0478	0.00494661	3.81244	0.0668288	31.8093	1.20972	30.7691	17.2915	-49.6843	1500.6	31.8093	1.20972	NA
BP-98-44	93.662	1438.21	0.733419	-0.591627	3886.55	-1.16442	3886.59	0.00499638	15.7392	0.00404961	32.1285	5.04419	#NUM!	#NUM!	NA	NA	32.1285	5.04419	NA
BP-98-52	113.542	1795.61	0.64646	23.5918	73.2029	0.0301252	73.8718	0.00515455	9.91818	0.134262	33.143	3.27875	30.1369	21.939	-203.431	2135.59	33.143	3.27875	NA
BP-98-98	272.189	4652.17	2.25992	36.4534	56.9459	0.0195496	57.7085	0.00516862	9.35029	0.162026	33.2333	3.09941	19.6588	11.2361	NA	NA	33.2333	3.09941	NA
BP-98-62	257.35	6082.16	2.92423	24.2155	46.2278	0.0298215	46.5107	0.00523747	5.12209	0.110127	33.6748	1.72036	29.8375	13.6765	-269.279	1232.27	33.6748	1.72036	NA
BP-98-19	114.226	2493.36	1.118	8.36733	209.345	0.08778	209.56	0.00532698	9.47847	0.0452304	34.2488	3.23765	85.4332	173.374	1948.93	220.743	34.2488	3.23765	NA
BP-98-76	722.674	8545.76	2.21464	21.6677	18.4077	0.033926	18.9422	0.00533145	4.46791	0.235871	34.2774	1.52742	33.8764	6.31114	5.54855	446.429	34.2774	1.52742	NA
BP-98-43	1035.33	15287	2.05639	20.9068	12.0075	0.03573	12.6187	0.00541777	3.87984	0.307467	34.8309	1.34774	35.6466	4.42013	90.9257	285.37	34.8309	1.34774	NA
BP-98-18	1148.84	16312.6	1.68764	21.3961	7.77124	0.0354431	8.34389	0.00550002	3.03781	0.364077	35.3583	1.07118	35.3652	2.90005	35.8156	186.269	35.3583	1.07118	NA
BP-98-33	1012.72	14790.6	0.577585	20.2801	7.92124	0.037396	8.32151	0.0055004	2.54981	0.306412	35.3607	0.899163	37.2785	3.04589	162.544	185.458	35.3607	0.899163	NA
BP-98-27	729.194	17528.9	1.02902	24.7188	18.7632	0.03071	18.8825	0.00550563	2.11859	0.112199	35.3942	0.747804	30.7132	5.71264	-321.81	485.137	35.3942	0.747804	NA
BP-98-74	291.768	3802.53	1.27061	17.5706	23.3009	0.0433088	23.953	0.00551902	5.55088	0.231741	35.4801	1.96405	43.0494	10.0964	488.192	520.571	35.4801	1.96405	NA
BP-98-61	102.944	2072.4	1.22539	15.7998	65.995	0.0481778	68.2837	0.00552074	17.5304	0.25673	35.4911	6.20465	47.777	31.8788	718.036	1592.22	35.4911	6.20465	NA
BP-98-13	264.575	4348.03	0.679613	22.2547	45.6714	0.0347668	46.5368	0.00561159	8.93289	0.191953	36.0735	3.21341	34.7018	15.8776	-59.1936	1168.27	36.0735	3.21341	NA
BP-98-75	212.414	2837.34	0.981645	32.3009	93.6351	0.0240474	94.312	0.00563355	11.2789	0.119591	36.2143	4.07312	24.1283	22.4914	-1063.26	2100.25	36.2143	4.07312	NA
BP-98-86	100.781	1519.54	0.8181	0.0746768	22290.3	10.8173	22290.3	0.0058587	11.7638	0.000527754	37.6574	4.41703	2507.55	#NUM!	NA	NA	37.6574	4.41703	NA
BP-98-54	727.239	25974	1.42671	20.3691	11.8381	0.0449502	12.0054	0.00664052	1.99737	0.166372	42.666	0.849383	44.6456	5.24381	152.309	278.139	42.666	0.849383	NA
BP-98-7	175.023	4623.51	1.24376	24.751	53.284	0.0369994	53.927	0.00664181	8.30264	0.153961	42.6743	3.53139	36.8902	19.5391	-325.156	1462.48	42.6743	3.53139	NA
BP-98-88	290.827	6410.97	2.61144	25.22	57.6524	0.0386999	57.7983	0.0070787	4.10424	0.0710097	45.4715	1.85969	38.5539	21.8691	-373.609	1619.16	45.4715	1.85969	NA
BP-98-89	126.873	4008.12	1.21677	30.9833	80.1207	0.0347408	80.7441	0.00780668	10.0143	0.124025	50.1297	5.00064	34.6763	27.5332	-939.747	2815.27	50.1297	5.00064	NA
BP-98-71	1222.16	22197.5	2.0594	20.6305	6.08124	0.0594324	6.25461	0.00889267	1.46241	0.233813	57.0724	0.83095	58.6214	3.56272	122.379	143.344	57.0724	0.83095	NA
BP-98-51	959.274	27071.7	1.91525	21.6433	4.91248	0.0585625	5.12607	0.00919267	1.46429	0.285656	58.989	0.859833	57.7874	2.87951	8.23961	118.286	58.989	0.859833	NA
BP-98-92	227.905	5262.48	2.46161	17.6048	10.0897	0.0924008	10.8973	0.0117979	4.11699	0.377798	75.6093	3.09464	89.7374	9.35958	483.898	223.313	75.6093	3.09464	NA
BP-98-50	816.174	27566.3	1.29954	21.115	6.21893	0.097793	6.33955	0.0149761	1.23076	0.19414	95.8261	1.17067	94.7371	5.7343	67.4272	148.128	95.8261	1.17067	NA
BP-98-87	1428.26	75151.9	0.922863	20.7242	2.76481	0.103291	3.55513	0.0155253	2.2349	0.628642	99.3138	2.20256	99.81	3.37957	111.679	65.2476	99.3138	2.20256	NA
BP-98-3	72.4182	5113.44	0.628943	19.0793	36.3306	0.164939	37.5576	0.0228237	9.52139	0.253514	145.477	13.6963	155.017	54.0453	303.466	853.754	145.477	13.6963	NA
BP-98-36	156.822	11396.7	0.97174	23.2156	14.0437	0.151786	14.2937	0.025557	2.66173	0.186217	162.681	4.27594	143.487	19.1287	-163.281	350.755	162.681	4.27594	NA
BP-98-100	122.808	6841.74	1.50322	22.6059	17.1253	0.157902	17.4081	0.0258887	3.12512	0.179521	164.766	5.08387	148.865	24.1091	-97.5082	423.157	164.766	5.08387	NA
BP-98-70	428.614	47416.9	1.92411	20.674	6.15281	0.17424	6.33363	0.0261259	1.50257	0.237237	166.256	2.46617	163.092	9.54304	117.428	145.17	166.256	2.46617	NA
BP-98-5	240.535	13753.5	0.82074	20.4622	6.40836	0.176455	6.67645	0.026187	1.87294	0.280529	166.639	3.08106	165.005	10.1683	141.646	150.533	166.639	3.08106	NA
BP-98-40	209.526	12062.6	1.94248	20.3135	9.06728	0.181358	9.49317	0.0267191	2.81153	0.296164	169.981	4.71662	169.228	14.7988	158.693	212.517	169.981	4.71662	NA
BP-98-15	1844.51	146476	2.22408	20.0883	0.717129	0.196861	0.974054	0.0286816	0.659172	0.676731	182.291	1.18478	182.467	1.62678	184.717	16.709	182.291	1.18478	NA
BP-98-79	1349.71	203322	1.97299	19.4337	1.59744	0.24872	1.79082	0.0350563	0.809464	0.452006	222.116	1.76733	225.536	3.62185	261.373	36.679	222.116	1.76733	NA
BP-98-84	1381.46	89946.1	2.05341	19.3403	1.39994	0.256	2.27758	0.0359089	1.79654	0.788792	227.424	4.01453	231.438	4.71365	272.385	32.0727	227.424	4.01453	NA
BP-98-17	810.688	73912.7	2.21558	19.4852	1.59207	0.25947	1.94902	0.0366682	1.12427	0.576841	232.148	2.56355	234.239	4.07707	255.253	36.6155	232.148	2.56355	NA
BP-98-6	138.335	45690.8	3.00802	18.253	4.98983	0.509879	5.45894	0.0674993	2.21395	0.405564	421.072	9.02437	418.368	18.7203	403.463	111.773	421.072	9.02437	104.364
BP-98-68	151.774	28115.7	2.0238	18.9168	4.30694	0.492012	4.44522	0.0675029	1.10012	0.247484	421.094	4.48448	406.28	14.8853	322.942	97.8472	421.094	4.48448	130.393
BP-98-24	204.261	27706.3	2.50214	18.1727	2.62031	0.554229	2.78031	0.0730477	0.929553	0.334335	454.491	4.07924	447.763	10.0673	413.328	58.5787	454.491	4.07924	109.959
BP-98-42	143.117	79373.6	2.40079	13.5859	1.18958	1.74913	1.58502	0.172349	1.04748	0.660859	1025.04	9.92693	1026.84	10.2402	1030.65	24.0665	1030.65	24.0665	99.4555
BP-98-48	500.371	183078	9.13807	13.4104	0.489223	1.86264	0.75678	0.181162	0.577388	0.762954	1073.32	5.7088	1067.92	4.99994	1056.93	9.8502	1056.93	9.8502	101.551
BP-98-97	75.944	24307.6	2.29003	13.3541	1.78186	1.82104	2.01681	0.176373	0.94471	0.468418	1047.13	9.13071	1053.06	13.2199	1065.39	35.8343	1065.39	35.8343	98.2857
BP-98-80	49.3394	28194.3	1.71262	13.3538	3.23675	1.93703	3.52605	0.187602	1.39875	0.396689	1108.37	14.2438	1093.97	23.617	1065.44	65.1216	1065.44	65.1216	104.029
BP-98-32	447.65	503136	3.0946	13.3261	0.635526	1.89916	1.10778	0.183554	0.907347	0.819069	1086.36	9.07127	1080.8	7.36851	1069.61	12.771	1069.61	12.771	101.567
BP-98-66	85.6157	20099.1	1.51389	13.2495	4.48966	1.82028	4.72385	0.174918	1.46891	0.310956	1039.15	14.0974	1052.78	30.9675	1081.18	90.1107	1081.18	90.1107	96.1126
BP-98-78	223.272	98533.6	2.20159	13.2328	1.09785	1.92603	1.74079	0.184848	1.35096	0.776061	1093.4	13.5867	1090.16	11.6354	1083.67	22.0103	1083.67	22.0103	100.898
BP-98-60	143.527	5648.55	1.74535	13.1278	1.48386	1.55073	1.98979	0.147647	1.32568	0.666242	887.761	10.9945	950.784	12.2837	1099.68	29.6822	1099.68	29.6822	80.7291
BP-98-29	223.553	89773.9	2.11273	13.0912	0.821677	1.90898	6.82576	0.18125	6.77612	0.992728	1073.8	67.0273	1084.23	45.5127	1105.26	16.4128	1105.26	16.4128	97.154
BP-98-25	82.1845	31712.5	2.16772	12.7693	1.81119	2.16534	2.42011	0.200536	1.60515	0.663255	1178.2	17.2843	1169.99	16.8116	1154.8	35.9437	1154.8	35.9437	102.027
BP-98-95	1001.53	215379	2.73072	12.5678	0.179124	2.22585	0.924026	0.202886	0.906499	0.981031	1190.8	9.85628	1189.21	6.47399	1186.34	3.53803	1186.34	3.53803	100.377
BP-98-67	245.544	42242.5	3.60659	12.5516	0.80996	2.06157	4.16012	0.18767	4.08051	0.980864	1108.74	41.566	1136.14	28.4514	1188.88	15.9749	1188.88	15.9749	93.2598
BP-98-65	188.964	237023	1.52106	11.2431	0.700926	2.90963	1.35879	0.23726	1.16405	0.856681	1372.43	14.3898	1384.42	10.2683	1402.92	13.4276	1402.92	13.4276	97.8272
BP-98-46	102.994	75056.1	1.35985	11.1545	0.992879	3.06363	1.36808	0.247848	0.941182	0.68796	1427.37	12.0508	1423.64	10.4732	1418.06	18.9817	1418.06	18.9817	100.656
BP-98-41	342.066	253183	1.7602	11.0259	0.257097	3.16514	0.980784	0.253109	0.946487	0.965031	1454.49	12.324	1448.7	7.56789	1440.2	4.90032	1440.2	4.90032	100.992
BP-98-23	89.6079	64565.6	0.918044	11.0139	1.55346	3.19377	2.27949	0.255119	1.66818	0.731823	1464.82	21.8586	1455.65	17.6283	1442.27	29.6026	1442.27	29.6026	101.564
BP-98-1	117.784	41409.4	1.90101	10.5624	6.07347	3.05943	9.87817	0.23437	7.79046	0.788654	1357.36	95.3608	1422.6	75.7332	1521.61	114.607	1521.61	114.607	89.2058
BP-98-58	357.895	7375.9	2.30094	10.1243	1.63339	2.9391	5.44482	0.215814	5.19405	0.953943	1259.72	59.4359	1392.04	41.2734	1601.05	30.4746	1601.05	30.4746	78.6809
BP-98-4	93.9583	119239	1.02776	9.80699	1.19844	4.15817	2.19563	0.295758	1.83971	0.837898	1670.24	27.0697	1665.82	17.9739	1660.24	22.1898	1660.24	22.1898	100.603
BP-98-82	162.785	115457	0.807978	9.70512	0.408786	4.24151	1.62374	0.298552	1.57145	0.967791	1684.12	23.2906	1682.09	13.3425	1679.54	7.5507	1679.54	7.5507	100.273
BP-98-93	1234.31	8250.99	13.9955	9.70233	0.18087	3.92653	1.53241	0.276302	1.5217	0.99301	1572.71	21.2363	1619.16	12.4021	1680.07	3.34062	1680.07	3.34062	93.6096
BP-98-31	147.707	119680	1.28959	9.68065	0.736081	4.46527	2.43649	0.31351	2.32265	0.953274	1757.95	35.7374	1724.54	20.2157	1684.2	13.5882	1684.2	13.5882	104.379
BP-98-49	279.699	209734	1.10805	9.67596	0.366701	4.27928	2.30438	0.300305	2.27502	0.987257	1692.82	33.8707	1689.38	18.9684	1685.1	6.76855	1685.1	6.76855	100.458
BP-98-81	446.302	319804	10.176	9.6525	0.417032	4.30398	1.55822	0.301307	1.50138	0.963521	1697.79	22.4098	1694.12	12.8395	1689.58	7.69318	1689.58	7.69318	100.486
BP-98-99	153.987	110426	1.72767	9.63695	0.537463	4.30638	0.924995	0.300989	0.752828	0.813872	1696.21	11.2277	1694.58	7.6224	1692.55	9.9111	1692.55	9.9111	100.216
BP-98-102	131.563	91887.1	1.46103	9.53853	1.0216	4.43236	1.70124	0.30663	1.36035	0.799623	1724.1	20.5794	1718.41	14.0951	1711.46	18.7926	1711.46	18.7926	100.739
BP-98-83	497.587	560558	3.62967	9.52753	0.18162	4.43928	1.1375	0.306755	1.1229	0.987171	1724.72	16.9926	1719.7	9.42679	1713.58	3.3403	1713.58	3.3403	100.65
BP-98-94	355.411	4369.18	1.39804	9.49925	1.67519	3.40155	7.23185	0.23435	7.03515	0.972801	1357.26	86.1082	1504.75	56.8072	1719.04	30.7869	1719.04	30.7869	78.9542
BP-98-73	123.566	42671	1.25858	9.47612	1.27282	4.42929	1.56133	0.304413	0.904253	0.579157	1713.16	13.6037	1717.83	12.9342	1723.52	23.3774	1723.52	23.3774	99.3985
BP-98-103	345.927	400180	2.13363	9.41006	0.326244	4.56814	0.862374	0.311767	0.798282	0.925679	1749.4	12.2306	1743.47	7.18393	1736.36	5.98123	1736.36	5.98123	100.751
BP-98-45	155.08	162640	1.51688	9.36602	0.532461	4.49218	1.17882	0.305149	1.05171	0.892174	1716.79	15.8513	1729.53	9.79043	1744.96	9.75269	1744.96	9.75269	98.3857
BP-98-37	347.444	74791.6	2.3764	9.23812	0.814031	4.45205	3.20221	0.298293	3.09701	0.967149	1682.84	45.871	1722.08	26.557	1770.11	14.8645	1770.11	14.8645	95.0697
BP-98-14	128.538	67851.4	2.53569	8.94698	0.527514	4.53875	3.29689	0.294518	3.25442	0.987116	1664.07	47.7313	1738.1	27.4388	1828.37	9.56499	1828.37	9.56499	91.0137
BP-98-91	107.173	77012	1.45712	8.84239	0.499591	5.26724	1.2991	0.337794	1.19919	0.923097	1876.05	19.5196	1863.57	11.0865	1849.66	9.03333	1849.66	9.03333	101.426
BP-98-39	814.063	33569.7	3.61455	8.66733	0.497455	5.24222	1.62012	0.329534	1.54186	0.951694	1836.12	24.6358	1859.51	13.816	1885.75	8.95563	1885.75	8.95563	97.3685
BP-98-101	81.5119	95295.5	1.06334	8.49519	1.08253	5.70872	1.31856	0.351731	0.752806	0.570932	1942.86	12.6276	1932.69	11.3932	1921.79	19.4079	1921.79	19.4079	101.097
BP-98-90	86.6261	103367	0.997427	6.15706	0.667558	10.5541	0.994468	0.471297	0.737111	0.741212	2489.25	15.2211	2484.69	9.22396	2480.95	11.2601	2480.95	11.2601	100.335
BP-98-9	197.448	225564	1.47559	6.14391	0.159891	10.5761	1.12988	0.471267	1.11851	0.989937	2489.12	23.0958	2486.61	10.4819	2484.55	2.69596	2484.55	2.69596	100.184
BP-98-57	205.201	6062.3	2.24215	5.83712	1.67666	7.854	4.37674	0.332497	4.04285	0.923714	1850.47	65.0343	2214.42	39.4412	2570.54	28.0274	2570.54	28.0274	71.9877
BP-98-55	952.724	848121	2.92443	5.66307	0.0821209	11.2135	1.41157	0.460564	1.40917	0.998306	2442.05	28.6454	2541.04	13.16	2621.02	1.36627	2621.02	1.36627	93.1717
BP-98-72	102.844	106535	1.20573	5.48935	0.450103	12.4367	2.66663	0.495138	2.62836	0.985652	2592.87	56.1125	2637.96	25.0664	2672.72	7.45172	2672.72	7.45172	97.0123
BP-98-10	155.725	236117	0.683579	5.4274	0.218945	12.9941	0.867505	0.511491	0.839421	0.967627	2662.99	18.3118	2679.23	8.17923	2691.49	3.61518	2691.49	3.61518	98.9413
BP-98-2	69.0704	146559	2.49979	5.29788	0.374747	13.5393	0.998861	0.520233	0.925898	0.926954	2700.17	20.4254	2718.03	9.44496	2731.33	6.16679	2731.33	6.16679	98.859
DB 35
DB-UPPER-43	146.506	1221.99	1.2085	-0.521593	3820	-0.992436	3820.03	0.00375433	13.9673	0.00365632	24.1567	3.36771	-4959.45	#NUM!	0	132.47	24.1567	3.36771	NA
DB-UPPER-15	297.195	158.768	0.729711	7.38815	43.7414	0.071529	44.6051	0.00383281	8.73547	0.19584	24.6606	2.15011	70.1494	30.2428	2168.54	806.239	24.6606	2.15011	NA
DB-UPPER-4	647.09	3457.88	1.5865	23.8931	38.1014	0.0221491	38.575	0.00383819	6.02636	0.156224	24.6952	1.48538	22.2443	8.48765	-235.348	992.287	24.6952	1.48538	NA
DB-UPPER-75	498.831	820.027	1.12776	17.8115	23.7958	0.0303173	28.5605	0.00391642	15.7942	0.553011	25.1976	3.97199	30.3262	8.53345	458.03	534.631	25.1976	3.97199	NA
DB-UPPER-30	176.757	1675.73	1.02815	11.284	127.654	0.0479988	128.792	0.00392821	17.0828	0.132638	25.2732	4.30892	47.6037	59.9645	1395.96	210.802	25.2732	4.30892	1.81046
DB-UPPER-101	249.733	1295.49	0.768888	24.9759	78.5071	0.0217354	80.2938	0.0039372	16.8443	0.209783	25.331	4.25845	21.8333	17.3453	-348.446	2435.55	25.331	4.25845	NA
DB-UPPER-79	205.127	1431.33	0.964773	17.857	85.3035	0.030596	86.4359	0.00396253	13.9458	0.161342	25.4936	3.54825	30.6009	26.0613	452.362	2486.15	25.4936	3.54825	NA
DB-UPPER-14	343.39	2889.48	1.06388	8.12501	138.921	0.0674374	139.24	0.00397396	9.41908	0.0676463	25.567	2.40341	66.2647	89.5524	2001.28	131.927	25.567	2.40341	NA
DB-UPPER-77	572.684	5832.2	2.62582	24.0348	23.7014	0.0230204	24.4032	0.00401284	5.81037	0.238098	25.8167	1.49705	23.1095	5.57583	-250.291	606.845	25.8167	1.49705	NA
DB-UPPER-93	284.147	2238.92	0.886466	10.1372	262.739	0.0556214	263.051	0.0040894	12.8028	0.0486703	26.3082	3.36131	54.9623	141.647	1598.67	735.712	26.3082	3.36131	1.64562
DB-UPPER-23	253.956	1751.23	1.12981	17.3804	48.2919	0.0325337	49.711	0.00410103	11.7933	0.237237	26.3829	3.10505	32.5081	15.9055	512.153	1125.27	26.3829	3.10505	NA
DB-UPPER-67	321.238	2574.72	1.28166	-3.35081	1138.57	-0.17069	1138.61	0.00414819	9.48831	0.00833322	26.6856	2.52678	-190.041	#NUM!	0	646.632	26.6856	2.52678	NA
DB-UPPER-74	186.998	975	0.901552	28.5911	89.1075	0.0200344	90.4041	0.00415439	15.2558	0.168751	26.7254	4.06873	20.1415	18.0313	-710.537	3284.99	26.7254	4.06873	NA
DB-UPPER-82	384.954	4412.17	1.5539	22.0699	51.4954	0.0261882	52.6497	0.00419185	10.9642	0.208248	26.9659	2.95042	26.2489	13.6437	-38.9059	1332.27	26.9659	2.95042	NA
DB-UPPER-81-1	1148.07	10730.9	2.20274	21.4346	18.7968	0.0270848	19.3267	0.00421056	4.49453	0.232556	27.086	1.21484	27.1356	5.17501	31.5538	453.792	27.086	1.21484	NA
DB-UPPER-95	1157.33	7154.74	1.64866	22.0117	15.2855	0.0264103	15.6458	0.00421624	3.33833	0.213369	27.1225	0.903537	26.4685	4.08774	-32.4931	372.563	27.1225	0.903537	NA
DB-UPPER-94	1195.25	7874.85	1.02066	19.1558	13.5344	0.0304162	13.8451	0.00422576	2.91666	0.210664	27.1836	0.791184	30.4237	4.14972	294.351	310.203	27.1836	0.791184	NA
DB-UPPER-88	202.942	1242.17	1.62196	11.4165	120.038	0.0512394	121.332	0.00424263	17.6745	0.14567	27.2919	4.81351	50.7385	60.1195	1373.55	181.691	27.2919	4.81351	1.98697
DB-UPPER-29	572.546	7508.63	2.39124	24.1717	28.0016	0.0242035	28.4667	0.0042431	5.12466	0.180023	27.2949	1.39581	24.2831	6.8307	-264.677	722.474	27.2949	1.39581	NA
DB-UPPER-84	1174.75	8501.58	2.91131	21.8149	9.63898	0.0272211	10.1445	0.00430683	3.16238	0.311734	27.704	0.874224	27.2703	2.72962	-10.7556	233.253	27.704	0.874224	NA
DB-UPPER-87	422.668	2476.13	1.35934	24.2932	45.3587	0.0250599	47.0252	0.00441532	12.4078	0.263854	28.4003	3.5161	25.1318	11.6737	-277.421	1208.6	28.4003	3.5161	NA
DB-UPPER-20	591.576	5762.84	0.920236	21.9586	24.7659	0.027789	25.2937	0.00442565	5.13997	0.203212	28.4666	1.45995	27.8316	6.94413	-26.6405	607.935	28.4666	1.45995	NA
DB-UPPER-104	982.076	293.912	0.356041	19.5575	45.1368	0.0312161	45.6432	0.00442784	6.78074	0.14856	28.4807	1.92694	31.2117	14.0302	246.771	1091.17	28.4807	1.92694	NA
DB-UPPER-17	413.267	3341.86	1.83917	23.204	31.7415	0.0273512	32.7396	0.00460296	8.02233	0.245035	29.6045	2.36953	27.3989	8.85057	-162.038	806.689	29.6045	2.36953	NA
DB-UPPER-61	208.542	1695.37	1.64285	41.442	75.4958	0.0154089	77.8709	0.00463139	19.0856	0.245093	29.787	5.6719	15.5266	11.9993	-1885.98	797.699	29.787	5.6719	NA
DB-UPPER-52	3688.72	57183.2	1.60903	20.9807	2.73087	0.0306613	3.15731	0.00466561	1.5846	0.501883	30.0065	0.474377	30.6652	0.953721	82.5489	64.8089	30.0065	0.474377	NA
DB-UPPER-89	1813.54	1746.81	1.77108	16.0618	28.9057	0.040199	28.9788	0.00468281	2.05821	0.0710247	30.1169	0.618424	40.0183	11.3718	683.021	629.61	30.1169	0.618424	NA
DB-UPPER-22	608.749	8255.96	1.38849	24.2086	24.5969	0.0269301	24.931	0.00472833	4.06749	0.16315	30.4089	1.23397	26.9827	6.63854	-268.557	632.638	30.4089	1.23397	NA
DB-UPPER-69	2559.71	2008.63	0.753933	19.8554	5.58058	0.0329306	6.70862	0.00474217	3.72327	0.554998	30.4978	1.13283	32.8984	2.17166	211.808	129.406	30.4978	1.13283	NA
DB-UPPER-65	1224.58	12071.4	1.13976	23.659	8.77866	0.0277132	9.6978	0.00475534	4.12097	0.424938	30.5822	1.2573	27.7567	2.65534	-210.558	220.744	30.5822	1.2573	NA
DB-UPPER-12	1388.29	30184.1	1.69072	21.3947	10.292	0.0324825	10.4439	0.00504027	1.7747	0.169926	32.4101	0.573737	32.4578	3.33628	35.9708	246.944	32.4101	0.573737	NA
DB-UPPER-8	557.438	762.461	1.99171	17.3008	16.1578	0.0409575	18.842	0.00513922	9.69255	0.514413	33.0447	3.19468	40.7584	7.52773	522.201	356.576	33.0447	3.19468	NA
DB-UPPER-91	360.058	4540.11	1.18786	15.0291	112.419	0.0472062	112.701	0.00514552	7.97695	0.0707795	33.0851	2.63242	46.8354	51.6297	823.356	514.077	33.0851	2.63242	NA
DB-UPPER-68	373.16	5398.63	2.31169	22.4483	27.4221	0.0321077	31.6626	0.00522747	15.8288	0.499921	33.6107	5.30633	32.0892	10.0017	-80.35	682.155	33.6107	5.30633	NA
DB-UPPER-80	271.827	4368.33	1.61229	33.783	97.6147	0.0218491	97.9342	0.00535341	7.90431	0.0807105	34.4182	2.71327	21.9463	21.2654	-1200.24	0	34.4182	2.71327	NA
DB-UPPER-98	300.22	4195.01	1.32965	24.4594	45.293	0.0306267	45.9951	0.00543307	8.00579	0.174057	34.929	2.78878	30.6312	13.8793	-294.8	1210.76	34.929	2.78878	NA
DB-UPPER-83	1953	33292.8	2.30335	21.6553	6.56566	0.0351208	6.81304	0.00551606	1.81927	0.267027	35.4611	0.64336	35.0492	2.34718	6.89848	158.173	35.4611	0.64336	NA
DB-UPPER-53	859.131	7319.56	3.25776	22.4055	15.514	0.0346009	16.1023	0.00562266	4.31264	0.267828	36.1445	1.55442	34.5391	5.46809	-75.6842	381.329	36.1445	1.55442	NA
DB-UPPER-21	449.488	7225.55	1.76374	30.4632	42.8075	0.0265341	43.1474	0.00586245	5.40525	0.125274	37.6815	2.03084	26.5911	11.3249	-890.499	1286.86	37.6815	2.03084	NA
DB-UPPER-16	644.768	8164.25	1.80141	25.2556	24.9457	0.0325094	25.0702	0.00595478	2.49628	0.0995714	38.2732	0.952575	32.4843	8.01516	-377.275	655.946	38.2732	0.952575	NA
DB-UPPER-32	683.155	17084.9	2.93027	20.824	19.2833	0.0399452	19.4158	0.00603292	2.26428	0.116621	38.7739	0.875315	39.7706	7.57266	100.338	459.788	38.7739	0.875315	NA
DB-UPPER-13	386.46	6158.48	1.17073	26.7574	21.5459	0.0367568	23.4198	0.00713315	9.1794	0.39195	45.82	4.19109	36.6527	8.43112	-529.584	582.55	45.82	4.19109	NA
DB-UPPER-105	324.747	9812.98	0.955435	21.5742	16.1577	0.173325	16.3019	0.0271203	2.16398	0.132744	172.5	3.68336	162.301	24.4566	15.9507	390.427	172.5	3.68336	NA
DB-UPPER-35	294.919	36540.7	2.04926	20.4707	6.95654	0.228456	7.27898	0.0339183	2.14245	0.294334	215.025	4.53083	208.923	13.7458	140.628	163.478	215.025	4.53083	NA
DB-UPPER-11	114.386	12802.5	2.14148	19.9633	15.8038	0.372582	15.9495	0.0539452	2.15094	0.134859	338.698	7.09709	321.566	43.9879	199.281	369.046	338.698	7.09709	NA
DB-UPPER-9	930.157	27865.2	2.77996	18.7841	1.63441	0.411928	2.89874	0.0561193	2.39403	0.825887	351.981	8.20062	350.263	8.58733	338.863	37.001	351.981	8.20062	NA
DB-UPPER-42	679.938	99290.3	1.63288	18.559	1.33495	0.418603	2.52034	0.0563452	2.13775	0.848202	353.361	7.35068	355.052	7.55159	366.104	30.0692	353.361	7.35068	NA
DB-UPPER-7	380.497	41917.3	2.05396	18.213	1.7159	0.484306	2.06442	0.0639737	1.14784	0.556011	399.746	4.44909	401.023	6.83962	408.365	38.3928	399.746	4.44909	NA
DB-UPPER-27	391.256	120869	5.59016	16.2948	1.84567	0.94527	2.3376	0.111713	1.43453	0.613677	682.688	9.29266	675.637	11.5344	652.201	39.6275	682.688	9.29266	104.674
DB-UPPER-19	149.345	40475.1	3.51878	13.8545	1.69288	1.68618	3.6194	0.169432	3.19909	0.883874	1008.98	29.8791	1003.32	23.0733	991.001	34.4288	991.001	34.4288	101.814
DB-UPPER-99	718.178	96940.7	3.06957	13.5157	1.16211	1.75927	1.61821	0.172453	1.12611	0.695895	1025.61	10.6776	1030.58	10.4766	1041.12	23.4727	1041.12	23.4727	98.5103
DB-UPPER-60	128.497	52902.2	1.32382	13.4516	2.64072	1.72488	3.14604	0.16828	1.71001	0.543543	1002.63	15.8782	1017.84	20.2238	1050.74	53.2362	1050.74	53.2362	95.4206
DB-UPPER-62	80.247	24393.9	1.75141	13.4259	2.77281	1.8351	3.68191	0.178691	2.42239	0.657917	1059.82	23.6737	1058.11	24.2034	1054.6	55.8582	1054.6	55.8582	100.495
DB-UPPER-3	624.973	489218	3.37458	13.4183	0.668436	1.83245	2.00671	0.178331	1.89211	0.942891	1057.85	18.4597	1057.16	13.1828	1055.74	13.48	1055.74	13.48	100.199
DB-UPPER-92	95.2467	26864.1	1.83088	13.1922	2.8795	1.83019	3.71581	0.175111	2.34856	0.632044	1040.21	22.5609	1056.35	24.4033	1089.85	57.7099	1089.85	57.7099	95.4457
DB-UPPER-26	112.029	45492.4	3.52726	12.7998	1.69448	2.12817	3.0061	0.197565	2.48302	0.825992	1162.23	26.4065	1157.99	20.7687	1150.09	33.6511	1150.09	33.6511	101.056
DB-UPPER-5	156.319	54448.5	2.24318	12.7489	2.15116	2.08012	3.31158	0.192337	2.51775	0.760286	1134.02	26.1816	1142.28	22.7122	1157.97	42.6817	1157.97	42.6817	97.932
DB-UPPER-64	106.389	25496.6	3.15126	12.6233	2.44758	2.15424	4.12913	0.197227	3.32552	0.80538	1160.41	35.3161	1166.42	28.642	1177.61	48.4128	1177.61	48.4128	98.5391
DB-UPPER-44	198.827	75577.9	6.60162	12.5624	1.1868	2.25689	3.03122	0.205628	2.78922	0.920167	1205.48	30.6671	1198.94	21.3313	1187.18	23.4482	1187.18	23.4482	101.542
DB-UPPER-48	30.4609	17277.8	1.15146	11.7854	8.19277	2.37336	8.37565	0.202865	1.74069	0.207828	1190.69	18.9248	1234.61	59.9035	1312.11	159.207	1312.11	159.207	90.7462
DB-UPPER-24	287.52	11932.6	1.30497	11.2232	0.671185	2.2904	8.35151	0.186434	8.32449	0.996765	1102.03	84.3302	1209.33	59.0946	1406.32	12.8519	1406.32	12.8519	78.3625
DB-UPPER-25	1934.89	175555	3.60301	11.1857	0.233465	3.10822	1.59797	0.252157	1.58082	0.98927	1449.59	20.5218	1434.72	12.2766	1412.73	4.46648	1412.73	4.46648	102.609
DB-UPPER-76	118.014	47554.3	1.1478	11.1793	2.47507	3.12129	2.86349	0.253073	1.44	0.502884	1454.3	18.7479	1437.95	22.0239	1413.83	47.3525	1413.83	47.3525	102.863
DB-UPPER-96	175.855	99294.7	2.0868	10.7369	1.44219	3.25687	2.11633	0.253618	1.54886	0.731858	1457.11	20.1997	1470.82	16.4423	1490.65	27.304	1490.65	27.304	97.7498
DB-UPPER-54	112.442	99868.9	1.12932	9.90223	1.63133	4.11881	2.12432	0.295803	1.3607	0.640533	1670.46	20.0237	1658.04	17.3578	1642.32	30.2744	1642.32	30.2744	101.714
DB-UPPER-85	66.7528	29852.5	1.61136	9.90183	1.75503	4.00225	2.98768	0.287421	2.41787	0.80928	1628.63	34.7979	1634.65	24.2765	1642.39	32.5703	1642.39	32.5703	99.1619
DB-UPPER-10	301.645	118669	2.31038	9.86237	0.420508	4.04232	2.11365	0.289142	2.0714	0.98001	1637.24	29.9499	1642.75	17.207	1649.8	7.79671	1649.8	7.79671	99.2385
DB-UPPER-102	140.611	105929	1.31683	9.86045	0.912	4.11892	2.31494	0.294563	2.12772	0.919127	1664.29	31.2099	1658.06	18.9158	1650.16	16.9074	1650.16	16.9074	100.856
DB-UPPER-40	259.065	192608	2.1839	9.82013	0.694587	3.7305	5.89164	0.265695	5.85055	0.993026	1518.91	79.1755	1577.94	47.2105	1657.76	12.8638	1657.76	12.8638	91.6246
DB-UPPER-70	110.882	100774	1.46806	9.81252	1.02129	4.21397	1.64989	0.299896	1.2958	0.785389	1690.79	19.2717	1676.74	13.5405	1659.19	18.9119	1659.19	18.9119	101.904
DB-UPPER-18	137.423	153713	2.30232	9.67872	1.70481	4.0598	1.82428	0.284985	0.649305	0.355925	1616.42	9.28306	1646.27	14.8636	1684.57	31.4683	1684.57	31.4683	95.9543
DB-UPPER-55	331.961	39194.5	1.83419	9.64067	0.657355	4.23925	1.66644	0.296411	1.53131	0.91891	1673.49	22.5701	1681.66	13.692	1691.84	12.1214	1691.84	12.1214	98.9153
DB-UPPER-71	103.118	190942	1.86559	9.50505	1.12371	4.67172	1.52207	0.322055	1.02664	0.674501	1799.76	16.122	1762.19	12.7306	1717.92	20.6544	1717.92	20.6544	104.764
DB-UPPER-78	1088.26	102035	5.85972	9.48902	0.474045	4.69619	4.91383	0.323196	4.89091	0.995336	1805.32	77.0142	1766.56	41.1575	1721.02	8.71034	1721.02	8.71034	104.898
DB-UPPER-37	227.32	104354	4.61343	9.39397	1.02653	4.48523	2.55823	0.305585	2.34325	0.915962	1718.95	35.3564	1728.24	21.2434	1739.5	18.817	1739.5	18.817	98.8183
DB-UPPER-66	124.792	95166.4	3.60932	9.08819	1.02807	4.82953	1.46499	0.318333	1.04369	0.712418	1781.58	16.246	1790.06	12.3242	1799.93	18.7045	1799.93	18.7045	98.9805
DB-UPPER-86	151.362	107341	1.20654	9.06877	0.798474	4.95403	2.87459	0.325841	2.76147	0.960648	1818.19	43.7502	1811.51	24.2905	1803.82	14.5198	1803.82	14.5198	100.797
DB-UPPER-33	287.396	38435.1	1.64804	8.96448	2.98238	4.59283	6.36287	0.29861	5.62064	0.883349	1684.41	83.3208	1747.97	53.1041	1824.83	54.1068	1824.83	54.1068	92.3053
DB-UPPER-45	121.669	179142	1.1033	8.59317	1.04662	5.43761	1.63214	0.338891	1.25238	0.767326	1881.33	20.4349	1890.8	13.999	1901.2	18.81	1901.2	18.81	98.955
DB-UPPER-59	170.379	109744	1.49747	7.59336	0.419875	6.95283	4.36715	0.382908	4.34692	0.995367	2089.85	77.5929	2105.42	38.7864	2120.66	7.35778	2120.66	7.35778	98.5472
DB-UPPER-2	781.368	11034.8	4.97913	7.59194	1.76854	0.607201	11.9614	0.0334337	11.8299	0.989009	212.003	24.672	481.793	45.9166	2120.99	30.9879	2120.99	30.9879	9.99547
DB-UPPER-36	176.712	356952	2.68378	6.14756	0.440908	10.2131	1.0742	0.455365	0.979549	0.911883	2419.06	19.7576	2454.27	9.93489	2483.55	7.43507	2483.55	7.43507	97.4033
DB-UPPER-56	494.998	16986	1.2416	5.66782	0.203114	11.8766	4.76099	0.488209	4.75666	0.99909	2562.92	100.6	2594.72	44.6167	2619.63	3.37972	2619.63	3.37972	97.8354
DB-UPPER-34	314.264	164809	2.24132	5.57199	0.299288	12.3533	3.67723	0.49922	3.66503	0.996682	2610.44	78.6763	2631.63	34.5551	2647.96	4.96669	2647.96	4.96669	98.5833
DB-UPPER-46	260.658	350527	1.95907	5.54347	0.367224	13.027	1.49215	0.523749	1.44625	0.969243	2715.06	32.0462	2681.61	14.0718	2656.47	6.08909	2656.47	6.08909	102.206
DB-UPPER-47	170.581	52854.6	1.25996	5.54213	0.401735	10.0325	7.8426	0.403258	7.83231	0.998687	2184.02	145.12	2437.77	72.5376	2656.87	6.66108	2656.87	6.66108	82.203
DB-UPPER-49	92.2653	105531	0.577995	5.45529	0.63193	12.7856	4.46846	0.505868	4.42355	0.98995	2638.97	95.8014	2663.98	42.1049	2683.02	10.4486	2683.02	10.4486	98.358
DB-UPPER-100	62.2657	36296.6	1.24875	5.29623	0.924194	13.6121	2.40098	0.522865	2.21599	0.922949	2711.32	49.048	2723.1	22.7145	2731.84	15.2133	2731.84	15.2133	99.2487
SP 2
SP2-97	369.916	3456.1	0.818665	12.7074	81.3914	0.0291952	83.0532	0.0026907	16.531	0.199041	17.3221	2.85966	29.2198	23.9266	1164.45	2069.03	17.3221	2.85966	1.48758
SP2-93	1154.12	8610.45	1.12616	23.5229	14.9077	0.0172753	15.4212	0.00294723	3.94632	0.255903	18.9711	0.747559	17.3912	2.6591	-196.095	374.953	18.9711	0.747559	NA
SP2-82	398.255	5304.79	0.554631	14.1897	162.988	0.0344024	163.893	0.00354046	17.2032	0.104966	22.783	3.91248	34.3442	55.4014	942.205	760.165	22.783	3.91248	NA
SP2-69	457.478	3572.86	1.18913	17.2484	20.3744	0.0283166	21.9732	0.00354233	8.22826	0.374468	22.795	1.87232	28.3527	6.14389	528.889	450.681	22.795	1.87232	NA
SP2-89	407.6	1274.14	1.70536	24.4486	93.6069	0.0208415	93.8307	0.00369556	6.47744	0.0690332	23.7792	1.53745	20.9446	19.4535	-293.67	1200.98	23.7792	1.53745	NA
SP2-9	759.947	8299.14	0.985784	23.2246	24.6868	0.0234758	27.0811	0.00395427	11.133	0.411101	25.4406	2.82673	23.5614	6.3073	-164.242	622.15	25.4406	2.82673	NA
SP2-24	209.295	1844.73	1.33434	14.0106	40.4862	0.0397106	41.5666	0.00403518	9.41568	0.22652	25.9601	2.43941	39.5415	16.1215	968.158	861.583	25.9601	2.43941	NA
SP2-20	642.605	4787.82	1.84091	21.4822	26.3377	0.0262571	27.7514	0.00409096	8.74441	0.315099	26.3182	2.29668	26.317	7.20962	26.2182	641.281	26.3182	2.29668	NA
SP2-30	255.431	3401.65	1.03698	18.28	41.0338	0.0311352	42.6091	0.00412789	11.4787	0.269396	26.5553	3.04194	31.132	13.0645	400.143	957.128	26.5553	3.04194	NA
SP2-76	284.729	4620.84	3.43414	21.3084	82.3674	0.027044	83.3885	0.00417946	13.0095	0.156011	26.8864	3.49051	27.0952	22.2991	45.6712	2470.66	26.8864	3.49051	NA
SP2-15	162.163	1846.44	1.43531	-2.75577	851.948	-0.225693	852.164	0.00451086	19.1863	0.0225148	29.0135	5.55412	-259.721	#NUM!	0	55.9572	29.0135	5.55412	NA
SP2-74	565.369	990.769	1.68138	18.9887	18.1246	0.0338821	18.6207	0.0046662	4.26977	0.229302	30.0103	1.27839	33.8333	6.19627	314.31	415.281	30.0103	1.27839	NA
SP2-72	151.716	2587.46	1.20138	18.0703	114.833	0.0383021	116.399	0.00501979	19.0292	0.163482	32.2787	6.12703	38.165	43.6261	425.947	827.196	32.2787	6.12703	NA
SP2-65	491.185	5807.05	1.91017	17.8381	14.0932	0.0390348	16.1305	0.0050501	7.84686	0.486462	32.4731	2.54171	38.8813	6.15324	454.721	314.171	32.4731	2.54171	NA
SP2-88	1163.88	7633.45	0.943588	22.0009	17.8077	0.0325012	18.0136	0.00518607	2.71609	0.15078	33.3452	0.903346	32.4762	5.75763	-31.3068	434.696	33.3452	0.903346	NA
SP2-75	233.296	2126.43	0.956907	21.8949	44.7504	0.0328386	48.3725	0.00521466	18.3657	0.379672	33.5285	6.14177	32.8079	15.6176	-19.6089	1133.93	33.5285	6.14177	NA
SP2-78	501.536	4330.11	1.28953	36.5113	52.9268	0.0202074	53.1601	0.00535103	4.97579	0.0935999	34.403	1.70726	20.3137	10.6919	-1448.03	1844.69	34.403	1.70726	NA
SP2-19	330.77	155.839	1.99369	17.7972	24.3365	0.041562	27.9708	0.00536471	13.7877	0.492932	34.4907	4.74278	41.348	11.3335	459.818	546.964	34.4907	4.74278	NA
SP2-25	519.755	7213.99	1.6924	20.7733	33.3533	0.0368455	33.7265	0.00555122	5.00344	0.148353	35.6865	1.78062	36.7395	12.1701	106.072	807.909	35.6865	1.78062	NA
SP2-50	291.817	4357.24	2.94241	21.5565	64.3433	0.0358306	66.0572	0.00560184	14.9496	0.226313	36.011	5.36851	35.7452	23.2055	17.9021	1724.72	36.011	5.36851	NA
SP2-14	552.966	7730.69	2.43654	21.2461	23.1063	0.036557	23.3535	0.00563313	3.389	0.145117	36.2116	1.22377	36.457	8.36314	52.6421	557.838	36.2116	1.22377	NA
SP2-23	425.219	3881.07	2.61701	25.7072	23.2329	0.0305601	27.0674	0.00569781	13.8881	0.513092	36.6262	5.07225	30.5655	8.15018	-423.499	615.585	36.6262	5.07225	NA
SP2-98	76.0202	881.522	1.20409	2.12542	649.648	0.378265	649.791	0.00583095	13.6266	0.0209708	37.4795	5.09238	325.761	#NUM!	4151.34	350.084	37.4795	5.09238	NA
SP2-95	458.528	306.101	2.77987	22.6844	25.7563	0.0369737	27.3196	0.00608302	9.1088	0.333417	39.0949	3.5503	36.865	9.89105	-106.027	642.608	39.0949	3.5503	NA
SP2-10	358.638	3662.57	1.67163	23.8551	29.9006	0.0395063	30.5709	0.00683512	6.36697	0.208269	43.9121	2.78637	39.3419	11.7977	-231.329	768.271	43.9121	2.78637	NA
SP2-104	621.065	8893.92	1.07811	24.6791	27.7322	0.0404805	28.0204	0.00724558	4.00855	0.143058	46.5396	1.85884	40.2931	11.0696	-317.682	722.831	46.5396	1.85884	NA
SP2-91	1764.55	76504.7	1.252	21.4263	5.34344	0.0474442	5.49818	0.00737276	1.29526	0.235579	47.3535	0.611102	47.0661	2.52873	32.4362	128.074	47.3535	0.611102	NA
SP2-80	362.06	7388.11	6.78484	26.4166	23.6777	0.0481394	26.14	0.00922309	11.0757	0.423705	59.1833	6.52495	47.7399	12.191	-495.363	636.947	59.1833	6.52495	NA
SP2-18	165.734	2758.94	2.96694	23.1994	64.6481	0.0646006	66.4725	0.0108696	15.4666	0.232677	69.6918	10.7209	63.5627	40.9787	-161.55	1791.79	69.6918	10.7209	NA
SP2-66	315.068	12253.8	3.53327	23.5563	25.9699	0.082582	29.2954	0.0141088	13.5568	0.462761	90.3156	12.1585	80.5696	22.6948	-199.648	659.96	90.3156	12.1585	NA
SP2-17	449.826	23612.5	1.8518	20.094	6.58777	0.176552	7.29955	0.0257298	3.14399	0.430711	163.767	5.08398	165.089	11.1225	184.06	153.573	163.767	5.08398	NA
SP2-35	59.3906	8638.04	0.634719	31.3056	69.7054	0.114474	70.3577	0.0259912	9.5587	0.135859	165.41	15.6099	110.05	73.5082	-970.122	2316.67	165.41	15.6099	NA
SP2-2	757.911	35776.5	1.33079	20.2228	3.07434	0.177644	4.21147	0.026055	2.87836	0.683457	165.81	4.71176	166.031	6.45069	169.159	71.8129	165.81	4.71176	NA
SP2-81	254.24	21894.6	1.81902	18.9173	8.36312	0.190365	9.20167	0.0261183	3.83783	0.41708	166.208	6.29726	176.941	14.9429	322.89	190.224	166.208	6.29726	NA
SP2-27	668.722	37112.3	1.33093	20.5353	4.30607	0.18174	5.18796	0.0270676	2.89357	0.557747	172.169	4.91591	169.557	8.10149	133.249	101.282	172.169	4.91591	NA
SP2-64	201.003	9288	2.3099	21.1284	13.9364	0.214252	14.4873	0.0328314	3.95734	0.273159	208.244	8.10926	197.114	25.9614	65.9178	333.125	208.244	8.10926	NA
SP2-4	384.35	11229.6	1.01725	18.4106	8.16906	0.254536	8.41677	0.0339873	2.02696	0.240824	215.455	4.29502	230.254	17.3414	384.17	183.802	215.455	4.29502	NA
SP2-16	910.667	69565.2	2.30947	19.7429	2.41902	0.24446	3.04353	0.035004	1.84699	0.60686	221.791	4.0268	222.066	6.07071	224.989	55.9499	221.791	4.0268	NA
SP2-87	591.405	51046.5	1.02537	19.9036	4.40432	0.245143	4.70564	0.0353876	1.65681	0.352091	224.18	3.6504	222.623	9.40723	206.209	102.224	224.18	3.6504	NA
SP2-79	150.41	14833.1	1.62064	19.2801	12.1562	0.253308	12.8875	0.0354208	4.27947	0.332064	224.386	9.43736	229.26	26.4538	279.566	279.167	224.386	9.43736	NA
SP2-102	733.499	3053.22	2.59224	13.8176	3.22411	0.477013	7.96874	0.0478036	7.28738	0.914496	301.023	21.4325	396.022	26.1374	996.395	65.5272	301.023	21.4325	30.2112
SP2-52	385.705	2708.88	2.84747	18.1304	11.6294	0.418175	12.7736	0.0549874	5.28428	0.413686	345.069	17.755	354.745	38.2629	418.531	260.506	345.069	17.755	NA
SP2-99	312.334	50291.5	6.04113	18.5046	3.59626	0.438386	4.00316	0.0588349	1.75848	0.439272	368.536	6.29886	369.114	12.389	372.722	80.993	368.536	6.29886	NA
SP2-101	257.22	3786.47	1.01817	18.0855	6.23793	0.452588	6.77337	0.0593654	2.63945	0.389681	371.765	9.53499	379.09	21.4319	424.06	139.3	371.765	9.53499	NA
SP2-28	280.042	23524.3	11.667	18.3594	5.12732	0.454124	5.29982	0.0604688	1.34114	0.253054	378.476	4.92976	380.163	16.8075	390.433	115.121	378.476	4.92976	NA
SP2-92	696.028	85599.7	1.49604	18.5679	2.20954	0.463365	3.21753	0.0623999	2.3389	0.726924	390.204	8.85577	386.596	10.3452	365.032	49.8171	390.204	8.85577	NA
SP2-59	173.587	17686.4	1.28275	19.2623	9.94356	0.470956	10.4891	0.0657941	3.33863	0.318296	410.767	13.2862	391.849	34.1124	281.686	227.996	410.767	13.2862	NA
SP2-5	283.769	41677.5	1.6831	16.5151	2.67713	0.865745	3.20416	0.103698	1.76059	0.549469	636.045	10.6634	633.254	15.0978	623.285	57.7246	636.045	10.6634	102.047
SP2-41	496.943	146724	2.09689	14.1491	0.950204	1.56553	1.63949	0.160653	1.33606	0.814921	960.405	11.9215	956.657	10.1587	948.031	19.4651	948.031	19.4651	101.305
SP2-84	320.292	129587	1.55707	13.8926	0.705029	1.63842	2.00456	0.165085	1.87649	0.936108	984.975	17.1402	985.105	12.6402	985.411	14.337	985.411	14.337	99.9558
SP2-53	193.53	77785.4	1.21215	13.8755	1.6737	1.55133	3.2716	0.156118	2.81107	0.859233	935.167	24.4705	951.024	20.2016	987.88	34.0419	987.88	34.0419	94.664
SP2-94	618.41	122119	5.74109	13.3008	0.692516	1.86485	1.37937	0.179895	1.19293	0.864836	1066.4	11.7249	1068.71	9.11724	1073.44	13.8895	1073.44	13.8895	99.3447
SP2-32	208.369	89169	2.47731	13.2799	1.72531	1.88698	4.06607	0.181745	3.68188	0.905513	1076.5	36.5032	1076.52	26.9917	1076.58	34.6378	1076.58	34.6378	99.9926
SP2-12	603.467	209962	2.87049	13.2017	0.651577	1.94893	2.86139	0.186606	2.78621	0.973728	1102.96	28.2458	1098.08	19.2039	1088.43	13.0388	1088.43	13.0388	101.335
SP2-51	112.467	40377.5	2.4402	13.1595	3.03629	1.90512	4.36905	0.181828	3.14158	0.719054	1076.95	31.1585	1082.88	29.1001	1094.85	60.8013	1094.85	60.8013	98.3655
SP2-57	38.3379	23977.9	2.32904	12.8903	6.56083	1.78204	8.24509	0.166602	4.9937	0.605657	993.361	45.9732	1038.93	53.6765	1136.1	130.696	1136.1	130.696	87.436
SP2-45	57.5596	13311	1.19227	12.8531	4.07772	1.93977	4.79818	0.180824	2.52878	0.527028	1071.47	24.9633	1094.92	32.158	1141.85	81.0858	1141.85	81.0858	93.8365
SP2-11	128.023	54790.3	3.23151	12.714	1.4293	2.19627	1.81651	0.202519	1.12107	0.617156	1188.84	12.1709	1179.86	12.6745	1163.41	28.3301	1163.41	28.3301	102.186
SP2-70	94.1684	39984	2.61059	12.7117	2.75744	2.17566	3.33195	0.200583	1.8704	0.561354	1178.45	20.1445	1173.29	23.1826	1163.77	54.6742	1163.77	54.6742	101.262
SP2-54	336.457	163074	2.11734	12.6979	1.02174	2.12813	2.46697	0.195987	2.24543	0.9102	1153.73	23.7204	1157.98	17.0431	1165.92	20.2423	1165.92	20.2423	98.9542
SP2-39	157.147	18822.1	3.16134	12.5943	1.73573	1.81256	3.29411	0.165564	2.79971	0.849915	987.622	25.6368	1050	21.5587	1182.16	34.3213	1182.16	34.3213	83.5436
SP2-60	87.4006	38616.3	0.95377	12.4503	2.51262	2.22236	5.90144	0.200674	5.33983	0.904835	1178.94	57.5339	1188.11	41.3493	1204.83	49.5054	1204.83	49.5054	97.8515
SP2-61	547.7	13526.2	2.7293	12.0511	1.238	2.56737	4.55837	0.224395	4.38704	0.962413	1305.06	51.8311	1291.39	33.3224	1268.76	24.1666	1268.76	24.1666	102.86
SP2-43	163.454	64032.1	2.41519	11.6625	1.57719	2.63771	2.23735	0.223109	1.58689	0.709271	1298.28	18.6602	1311.22	16.474	1332.42	30.5126	1332.42	30.5126	97.438
SP2-46	225.731	147394	1.64387	11.2602	0.982738	2.85975	1.77819	0.233546	1.48195	0.833406	1353.06	18.0872	1371.38	13.3783	1400.02	18.834	1400.02	18.834	96.6457
SP2-77	323.228	11972.6	2.55049	11.2393	1.55326	2.39159	10.907	0.194951	10.7958	0.989808	1148.14	113.552	1240.09	78.2488	1403.57	29.7545	1403.57	29.7545	81.8009
SP2-63	57.4706	20139.7	1.30786	11.1694	3.29631	2.99306	3.85362	0.242461	1.99619	0.518004	1399.48	25.112	1405.86	29.3379	1415.52	63.0564	1415.52	63.0564	98.8668
SP2-105	113.784	55494.1	1.49484	11.0788	1.72659	3.25041	3.43746	0.261174	2.97237	0.864701	1495.84	39.6809	1469.27	26.6977	1431.07	32.9521	1431.07	32.9521	104.526
SP2-31	95.0913	50755.5	1.58716	10.9965	2.50522	3.15539	3.62969	0.251655	2.6265	0.723616	1447	34.0424	1446.32	27.9931	1445.29	47.7244	1445.29	47.7244	100.119
SP2-1	405.03	100360	1.56878	10.9889	0.596634	3.1654	1.82358	0.25228	1.72321	0.944963	1450.22	22.379	1448.76	14.0719	1446.6	11.3622	1446.6	11.3622	100.251
SP2-48	360.563	16325.9	1.85333	10.8779	1.55793	3.37126	1.92692	0.265971	1.13396	0.588485	1520.32	15.3578	1497.74	15.0908	1465.92	29.5934	1465.92	29.5934	103.711
SP2-36	400.516	274134	3.49116	10.6998	0.491212	3.2184	2.12827	0.249756	2.0708	0.973	1437.22	26.6778	1461.6	16.4887	1497.19	9.29124	1497.19	9.29124	95.9942
SP2-67	350.929	301130	4.3799	10.327	0.917547	3.53496	3.27199	0.264762	3.1407	0.959876	1514.16	42.3836	1535.07	25.9028	1563.99	17.2014	1563.99	17.2014	96.8139
SP2-83	53.4158	32229.1	1.98055	9.96888	2.42733	3.96234	3.00102	0.286482	1.7647	0.588034	1623.92	25.3329	1626.52	24.3359	1629.86	45.1242	1629.86	45.1242	99.6357
SP2-3	144.042	41550.9	1.01267	9.7563	1.07501	4.06383	2.06666	0.287554	1.76507	0.854065	1629.29	25.4118	1647.08	16.8421	1669.82	19.8799	1669.82	19.8799	97.5729
SP2-103	226.968	179399	1.86874	9.74468	0.60236	4.1394	2.43407	0.292552	2.35836	0.968896	1654.27	34.4103	1662.12	19.9088	1672.03	11.1352	1672.03	11.1352	98.938
SP2-62	170.107	60678.4	2.19491	9.70456	0.677333	4.26771	1.20523	0.300379	0.996898	0.827141	1693.19	14.8446	1687.16	9.91488	1679.65	12.511	1679.65	12.511	100.806
SP2-21	588.923	44691	64.6024	9.67203	0.365178	4.20849	2.3334	0.295217	2.30465	0.987678	1667.55	33.863	1675.68	19.1463	1685.85	6.73978	1685.85	6.73978	98.9144
SP2-26	497.178	322482	4.73303	9.63599	0.297199	4.20786	1.74971	0.294074	1.72428	0.985469	1661.86	25.2596	1675.55	14.3558	1692.74	5.48035	1692.74	5.48035	98.1756
SP2-68	124.12	56862	1.80388	9.53337	0.844387	4.22521	1.67524	0.292141	1.44687	0.86368	1652.22	21.0878	1678.93	13.7555	1712.45	15.5304	1712.45	15.5304	96.4827
SP2-71	267.302	221532	3.48258	9.52821	0.662188	4.36724	1.27039	0.301799	1.08416	0.853405	1700.22	16.2026	1706.16	10.4964	1713.45	12.1773	1713.45	12.1773	99.2281
SP2-7	82.562	62608.2	1.3274	9.46374	1.45502	4.31706	1.83931	0.296312	1.12515	0.611726	1672.99	16.5795	1696.62	15.1647	1725.92	26.7167	1725.92	26.7167	96.9333
SP2-22	190.879	126037	2.29222	9.40532	0.352233	4.3587	0.842186	0.297323	0.76499	0.908338	1678.02	11.302	1704.54	6.95572	1737.29	6.4571	1737.29	6.4571	96.5887
SP2-40	448.439	219905	1.31111	9.38993	0.20827	4.80503	1.67036	0.327233	1.65733	0.992196	1824.96	26.3414	1785.78	14.0398	1740.29	3.81582	1740.29	3.81582	104.865
SP2-49	202.438	122502	2.03456	9.35408	0.903541	4.47063	3.38035	0.303297	3.25736	0.963616	1707.64	48.8672	1725.54	28.0565	1747.3	16.5461	1747.3	16.5461	97.7304
SP2-58	462.304	340112	2.65829	9.32896	0.290613	4.57594	1.50862	0.309608	1.48037	0.98127	1738.78	22.5611	1744.9	12.5717	1752.22	5.31909	1752.22	5.31909	99.233
SP2-44	214.127	158212	1.17651	9.24475	0.555898	4.57857	1.1876	0.30699	1.04946	0.883684	1725.88	15.8905	1745.38	9.89741	1768.8	10.1536	1768.8	10.1536	97.5735
SP2-86	507.309	347242	5.74412	9.23164	1.28789	3.94708	5.52438	0.264273	5.37216	0.972446	1511.67	72.3932	1623.39	44.7839	1771.39	23.5152	1771.39	23.5152	85.338
SP2-42	268.845	138999	2.53704	9.03425	0.440632	4.93527	2.24578	0.323372	2.20213	0.980563	1806.18	34.6885	1808.31	18.9635	1810.75	8.00489	1810.75	8.00489	99.7471
SP2-90	148.448	90995.6	2.61003	8.92546	0.73908	5.02237	0.950481	0.325116	0.597642	0.628779	1814.66	9.45244	1823.1	8.04867	1832.74	13.3941	1832.74	13.3941	99.0139
SP2-37	180.132	138797	4.50129	8.72717	0.665715	5.1353	1.33722	0.325041	1.15974	0.867272	1814.3	18.3395	1841.97	11.3653	1873.35	12.0053	1873.35	12.0053	96.8481
SP2-55	1527.37	930747	4.68305	8.5648	0.543599	3.74868	2.08137	0.23286	2.00913	0.965292	1349.47	24.4629	1581.83	16.6849	1907.14	9.76356	1907.14	9.76356	70.7587
SP2-29	359.54	277460	0.794932	6.2822	0.191803	9.78548	3.50163	0.445854	3.49637	0.998499	2376.79	69.5058	2414.78	32.2692	2446.95	3.2463	2446.95	3.2463	97.1327
SP2-33	360.324	331178	1.49014	5.25843	0.320187	13.4932	1.93531	0.514599	1.90864	0.986219	2676.23	41.8042	2714.81	18.2969	2743.62	5.26611	2743.62	5.26611	97.5438
SP2-6	303.992	568362	1.24009	5.09594	0.249075	14.0745	3.82998	0.520184	3.82187	0.997883	2699.96	84.3101	2754.74	36.3247	2795.12	4.07726	2795.12	4.07726	96.5956
CB 4
CB4-73	381.544	3145.96	1.14507	13.3938	54.9374	0.0391146	57.4593	0.00379964	16.8364	0.293014	24.4477	4.10831	38.9592	21.9651	1059.41	1202.99	24.4477	4.10831	2.30766
CB4-3	383.554	4020.23	0.904507	19.0337	42.3802	0.0284524	42.7637	0.00392771	5.71469	0.133634	25.2701	1.44128	28.4867	12.0132	308.941	1007.09	25.2701	1.44128	NA
CB4-61	629.083	2502.56	1.82549	19.8665	14.5831	0.029149	16.1604	0.00419994	6.96376	0.430914	27.0179	1.87752	29.1742	4.64763	210.52	339.545	27.0179	1.87752	NA
CB4-34	143.286	1080.41	2.16613	9.18406	315.872	0.0631671	316.175	0.0042075	13.8211	0.0437135	27.0664	3.73303	62.1945	193.034	1780.81	799.313	27.0664	3.73303	NA
CB4-94	1589.54	10789.2	1.61802	19.6817	9.62854	0.029837	10.4046	0.00425908	3.94295	0.378962	27.3975	1.07798	29.8528	3.06085	232.136	222.721	27.3975	1.07798	NA
CB4-19	392.624	7249.28	1.14882	19.8039	29.2162	0.0297721	30.7015	0.0042762	9.43367	0.307271	27.5074	2.58943	29.7888	9.013	217.831	689.309	27.5074	2.58943	NA
CB4-65	542.036	14602	1.52005	27.6244	38.697	0.0215946	39.6251	0.00432652	8.52603	0.215167	27.8303	2.36771	21.6934	8.50507	-615.776	1089.16	27.8303	2.36771	NA
CB4-85	265.116	2106.55	1.35936	27.95	48.1032	0.0215377	49.0835	0.00436597	9.7607	0.198859	28.0836	2.7352	21.6369	10.5082	-647.845	1389.41	28.0836	2.7352	NA
CB4-43	244.747	3422.79	2.24271	13.8816	117.33	0.0439041	118.992	0.00442021	19.8218	0.16658	28.4317	5.62327	43.6286	50.8576	987.015	431.241	28.4317	5.62327	2.88058
CB4-42	383.072	3156.59	0.759618	27.3836	41.4597	0.0224622	42.8128	0.00446109	10.6783	0.249418	28.6941	3.05722	22.5554	9.55039	-591.951	1167.05	28.6941	3.05722	NA
CB4-36	422.544	2656.12	2.69281	28.0264	37.7554	0.021968	38.7009	0.00446535	8.50237	0.219694	28.7214	2.43657	22.0644	8.44722	-655.341	1069.71	28.7214	2.43657	NA
CB4-13	238.785	2113.1	1.50877	1.03985	3345.28	0.596906	3345.3	0.00450168	13.9347	0.00416545	28.9545	4.02568	475.268	#NUM!	0	693.107	28.9545	4.02568	NA
CB4-4	356.314	2810.67	1.41118	31.0707	33.3373	0.0200097	34.2762	0.00450912	7.96733	0.232445	29.0023	2.30552	20.1169	6.82756	-948	998.929	29.0023	2.30552	NA
CB4-86	520.385	3690.41	2.0151	32.0225	46.7224	0.0201704	46.8815	0.00468456	3.85823	0.0822976	30.1281	1.1597	20.2769	9.41209	-1037.3	1462.06	30.1281	1.1597	NA
CB4-15	623.238	5324.54	1.25697	26.6159	25.9511	0.0246995	26.2426	0.00476792	3.90019	0.148621	30.6629	1.19307	24.7747	6.42293	-515.403	702.653	30.6629	1.19307	NA
CB4-49	504.488	5263.01	3.70178	25.2385	24.4764	0.0274905	25.7148	0.00503205	7.88403	0.306595	32.3573	2.54467	27.5366	6.98593	-375.513	643.069	32.3573	2.54467	NA
CB4-62	567.688	6666.17	1.56258	19.03	17.8291	0.0365333	18.2271	0.00504227	3.78818	0.207833	32.4229	1.22515	36.4337	6.52316	309.346	408.772	32.4229	1.22515	NA
CB4-91	638.315	15530	1.31734	21.8905	12.0286	0.0330118	13.7274	0.00524111	6.61476	0.481866	33.6981	2.22323	32.9782	4.45435	-19.1171	291.884	33.6981	2.22323	NA
CB4-45	242.275	3592.04	3.39381	16.0785	39.9958	0.0455843	41.1603	0.00531568	9.7215	0.236186	34.1763	3.31366	45.2616	18.2227	680.797	888.736	34.1763	3.31366	NA
CB4-87	598.439	2569.37	1.75418	18.2567	21.1633	0.0430105	21.7983	0.00569504	5.22313	0.239611	36.6084	1.90669	42.7591	9.12748	403.001	478.707	36.6084	1.90669	NA
CB4-57	848.9	40837.4	2.32095	22.6023	12.2653	0.0348344	12.893	0.00571032	3.97394	0.308225	36.7064	1.45455	34.7682	4.40681	-97.1156	302.145	36.7064	1.45455	NA
CB4-78	269.467	2807.88	0.936531	30.0543	35.4889	0.0262092	36.6288	0.00571294	9.06683	0.247533	36.7232	3.32016	26.2696	9.49913	-851.559	1044.57	36.7232	3.32016	NA
CB4-47	287.764	4015.01	1.32677	21.1855	40.416	0.0393342	40.8156	0.00604376	5.69716	0.139583	38.8433	2.20631	39.1738	15.6858	59.4891	999.942	38.8433	2.20631	NA
CB4-1	782.717	8228.71	1.38	19.6217	12.4081	0.046631	12.6294	0.00663607	2.35405	0.186395	42.6375	1.0004	46.2776	5.71345	239.22	287.044	42.6375	1.0004	NA
CB4-5	252.579	5621.09	1.58475	26.8484	49.1701	0.0364433	49.9538	0.00709636	8.81371	0.176437	45.5845	4.00352	36.3456	17.8367	-538.688	1392.42	45.5845	4.00352	NA
CB4-12	399.712	18448.6	3.00019	20.3663	15.3754	0.050066	15.8984	0.00739528	4.04433	0.254386	47.4976	1.9139	49.6046	7.69694	152.62	362.01	47.4976	1.9139	NA
CB4-76	253.024	4292.98	1.72092	30.0487	55.4006	0.0360248	55.5019	0.00785102	3.35111	0.0603783	50.4133	1.68282	35.9355	19.5985	-851.024	1702.2	50.4133	1.68282	NA
CB4-27	129.287	2898.13	1.38352	27.031	42.1249	0.044453	44.4313	0.0087149	14.1292	0.318002	55.9365	7.8692	44.1624	19.2036	-556.913	1178.78	55.9365	7.8692	NA
CB4-66	380.585	11016.6	1.57457	21.6516	25.4118	0.0558034	26.0412	0.00876293	5.69075	0.218529	56.2434	3.18675	55.1374	13.9764	7.33348	620.246	56.2434	3.18675	NA
CB4-69	680.059	15323.9	3.1798	19.941	13.5752	0.0630573	14.8282	0.00911973	5.96592	0.402335	58.5231	3.47564	62.0896	8.93119	201.836	316.401	58.5231	3.47564	NA
CB4-54	192.036	4739.16	1.99799	19.5344	29.8192	0.0815188	30.5396	0.0115493	6.59413	0.21592	74.025	4.85339	79.5719	23.3773	249.459	700.137	74.025	4.85339	NA
CB4-56	289.088	10436.9	3.22112	24.6312	34.6823	0.0655465	35.6371	0.0117094	8.19431	0.229937	75.0449	6.11376	64.4644	22.2628	-312.703	911.814	75.0449	6.11376	NA
CB4-9	222.404	354.539	2.35698	15.1396	27.9432	0.119495	29.1508	0.0131209	8.30363	0.28485	84.0324	6.93246	114.614	31.6045	808.006	595.805	84.0324	6.93246	NA
CB4-2	388.53	21619.4	1.3839	19.7632	4.30772	0.126389	6.04806	0.0181162	4.2453	0.701927	115.739	4.86964	120.848	6.89088	222.596	99.684	115.739	4.86964	NA
CB4-18	121.326	6768.88	1.79065	24.0088	27.1356	0.129393	27.8882	0.022531	6.43533	0.230754	143.632	9.14098	123.552	32.4537	-247.553	697.038	143.632	9.14098	NA
CB4-17	198.796	11265.9	1.4764	18.5477	13.7796	0.16933	14.2609	0.0227784	3.67363	0.257601	145.192	5.27419	158.838	20.9718	367.48	311.826	145.192	5.27419	NA
CB4-67	111.087	503.257	1.81129	18.4706	19.8817	0.177544	20.5434	0.023784	5.17205	0.251762	151.527	7.74564	165.945	31.4608	376.862	451.232	151.527	7.74564	NA
CB4-16	325.518	16732.4	1.30763	19.8335	6.36029	0.1732	8.52233	0.0249141	5.67247	0.6656	158.639	8.88892	162.192	12.7758	214.41	147.444	158.639	8.88892	NA
CB4-52	327.746	19451.6	1.28948	19.5653	10.5178	0.175881	10.9311	0.0249576	2.97768	0.272403	158.912	4.67404	164.51	16.6031	245.853	242.813	158.912	4.67404	NA
CB4-8	247.286	17240.3	2.1131	22.0569	7.44524	0.16507	8.07538	0.0264065	3.12734	0.387268	168.019	5.18663	155.131	11.6179	-37.474	180.959	168.019	5.18663	NA
CB4-20	136.817	8185.79	1.13098	23.0769	28.3844	0.158995	29.0582	0.0266109	6.22122	0.214095	169.302	10.3956	149.823	40.4977	-148.398	716.225	169.302	10.3956	NA
CB4-103	245.511	13627.1	1.44195	21.2871	16.9491	0.17895	17.5345	0.0276278	4.49298	0.256237	175.684	7.78687	167.157	27.0309	48.033	407.336	175.684	7.78687	NA
CB4-105	562.3	31297.5	1.47652	19.2896	2.12716	0.279702	3.37742	0.0391308	2.62338	0.776742	247.443	6.36837	250.421	7.49565	278.437	48.7208	247.443	6.36837	NA
CB4-64	435.749	118968	2.13019	18.2867	2.85659	0.490254	3.38549	0.0650214	1.81698	0.536697	406.091	7.15101	405.084	11.3092	399.323	64.027	406.091	7.15101	NA
CB4-40	300.732	18762	7.82211	17.7581	2.37352	0.508741	3.6447	0.0655228	2.7659	0.758884	409.125	10.9644	417.602	12.4794	464.7	52.5926	409.125	10.9644	NA
CB4-35	263.838	42013.3	3.90349	18.5979	3.97427	0.490721	5.1459	0.0661909	3.26886	0.635236	413.166	13.0821	405.402	17.2017	361.382	89.686	413.166	13.0821	NA
CB4-96	122.897	19204.4	1.34046	19.1173	7.46016	0.498683	7.99787	0.0691435	2.88303	0.360475	430.993	12.0194	410.811	27.0285	298.898	170.383	430.993	12.0194	NA
CB4-39	86.8397	24788.5	1.15717	17.295	7.41135	0.689626	7.94484	0.0865034	2.86224	0.360263	534.825	14.6902	532.576	32.9375	522.933	162.78	534.825	14.6902	102.274
CB4-10	66.3725	17525.3	1.6209	16.3054	8.15201	0.752769	9.17052	0.089021	4.20038	0.45803	549.744	22.1342	569.83	40.0116	650.826	175.275	549.744	22.1342	84.4688
CB4-72	60.3466	99711.8	3.67916	13.7867	3.96053	1.66545	5.06552	0.166528	3.15811	0.623452	992.955	29.063	995.452	32.1484	1000.94	80.4332	1000.94	80.4332	99.2022
CB4-68	147.453	27548.7	1.27225	13.6648	2.08467	1.76506	2.79923	0.174929	1.86811	0.667365	1039.21	17.9297	1032.71	18.1456	1018.94	42.2387	1018.94	42.2387	101.99
CB4-30	135.485	50448.7	3.28289	13.5166	2.52995	1.74944	3.06427	0.1715	1.72889	0.564211	1020.37	16.3158	1026.95	19.8	1040.99	51.05	1040.99	51.05	98.0196
CB4-7	429.081	104761	0.810952	13.312	0.891828	1.81469	2.17643	0.175204	1.98532	0.91219	1040.72	19.0801	1050.77	14.2487	1071.74	17.9033	1071.74	17.9033	97.1055
CB4-22	227.342	140738	2.17361	13.2559	2.08135	1.89959	2.74067	0.182628	1.78305	0.650588	1081.32	17.7501	1080.95	18.2329	1080.18	41.7706	1080.18	41.7706	100.105
CB4-47	218.01	126642	3.02628	13.0538	1.14854	1.7486	2.12956	0.165549	1.79329	0.842095	987.541	16.4198	1026.65	13.7571	1110.93	22.9268	1110.93	22.9268	88.8931
CB4-100	187.918	101662	3.54939	12.6496	1.36239	2.22757	3.20296	0.204365	2.89876	0.905027	1198.72	31.709	1189.75	22.4495	1173.51	26.9777	1173.51	26.9777	102.149
CB4-99	331.649	179137	4.49131	12.6018	1.6542	2.10667	3.36501	0.192543	2.93035	0.870828	1135.14	30.4997	1150.99	23.1736	1180.99	32.7214	1180.99	32.7214	96.1174
CB4-58	379.321	129317	2.36112	12.4768	0.798772	1.92059	3.41788	0.173795	3.32323	0.972308	1032.99	31.7195	1088.27	22.8257	1200.67	15.7432	1200.67	15.7432	86.034
CB4-44	71.8721	27682.9	2.51263	12.3854	2.83693	2.32341	3.82378	0.208706	2.56381	0.670491	1221.92	28.5379	1219.47	27.1499	1215.14	55.8336	1215.14	55.8336	100.558
CB4-92	287.857	143176	3.42732	11.6992	1.08767	2.68409	4.06909	0.227746	3.92103	0.963613	1322.67	46.8886	1324.08	30.1107	1326.34	21.0598	1326.34	21.0598	99.7234
CB4-25	45.8981	22897.3	1.76105	11.6642	3.01131	2.61872	4.25871	0.221536	3.01142	0.70712	1289.99	35.2072	1305.91	31.3026	1332.14	58.2588	1332.14	58.2588	96.8357
CB4-63	186.991	84301.9	2.52635	11.5697	1.31389	2.68651	2.84556	0.22543	2.52407	0.887019	1310.5	29.9326	1324.75	21.0588	1347.85	25.3645	1347.85	25.3645	97.2287
CB4-95	79.5497	38514.6	1.36408	11.5614	2.32814	2.72437	3.22387	0.228442	2.23005	0.691729	1326.33	26.7335	1335.13	23.9498	1349.25	44.9384	1349.25	44.9384	98.3012
CB4-82	46.5365	29528.9	2.3935	11.5226	3.21206	2.84247	3.91073	0.237545	2.23082	0.570434	1373.92	27.6039	1366.82	29.3829	1355.72	61.9525	1355.72	61.9525	101.343
CB4-48	50.3255	20202	1.84216	11.4343	2.19888	2.95137	2.64676	0.244756	1.47319	0.556602	1411.38	18.6736	1395.2	20.076	1370.54	42.3184	1370.54	42.3184	102.979
CB4-71	247.405	49627.8	2.23125	11.2693	1.18769	2.979	1.53012	0.243482	0.964707	0.63048	1404.78	12.1771	1402.28	11.6324	1398.46	22.7668	1398.46	22.7668	100.452
CB4-6	114.683	44562	1.3021	11.245	1.21938	2.93864	2.01004	0.239665	1.59792	0.794973	1384.95	19.9148	1391.92	15.2288	1402.6	23.3612	1402.6	23.3612	98.7416
CB4-50	113.59	66305.2	1.60037	11.2199	2.58171	3.03779	3.21677	0.247198	1.91895	0.596546	1424.01	24.5184	1417.17	24.5781	1406.89	49.4398	1406.89	49.4398	101.217
CB4-79	119.258	120072	2.23218	11.0145	1.48325	3.14843	2.47448	0.251512	1.98066	0.800436	1446.27	25.6599	1444.62	19.0711	1442.17	28.2649	1442.17	28.2649	100.285
CB4-55	1584.35	17938.7	36.6195	11.0032	0.699497	2.42601	1.68464	0.193602	1.53255	0.909721	1140.86	16.0245	1250.34	12.1133	1444.13	13.3256	1444.13	13.3256	78.9995
CB4-26	102.833	99534.3	1.56787	10.9003	1.23402	3.37107	7.75171	0.266505	7.65286	0.987247	1523.04	103.819	1497.7	60.7751	1462	23.4525	1462	23.4525	104.175
CB4-80	38.4553	46326.6	1.0927	10.8476	4.41803	3.07817	4.87828	0.242173	2.06848	0.424018	1397.98	25.9965	1427.27	37.4042	1471.21	83.8961	1471.21	83.8961	95.0229
CB4-74	161.222	74398.2	1.16469	10.5393	0.718336	3.38211	2.54877	0.258522	2.44545	0.959462	1482.28	32.383	1500.26	19.9765	1525.74	13.5344	1525.74	13.5344	97.1517
CB4-97	215.732	3427.98	1.36318	9.85418	1.85307	3.6716	3.57105	0.262407	3.05262	0.854826	1502.14	40.9047	1565.22	28.5055	1651.34	34.3509	1651.34	34.3509	90.9649
CB4-84	81.7028	57857.1	1.18522	9.835	1.59273	4.16019	2.34133	0.296747	1.71611	0.732962	1675.16	25.316	1666.22	19.1686	1654.95	29.5118	1654.95	29.5118	101.221
CB4-29	95.5692	71280.2	1.37595	9.65736	1.34956	4.31264	2.70892	0.302065	2.34881	0.867067	1701.54	35.1268	1695.78	22.3321	1688.65	24.8983	1688.65	24.8983	100.763
CB4-90	391.903	178349	3.26434	9.56303	0.358077	4.34551	1.01789	0.301395	0.952827	0.936081	1698.22	14.2252	1702.04	8.40218	1706.74	6.58958	1706.74	6.58958	99.5011
CB4-77	60.0716	45390.9	0.979462	9.55445	1.58208	4.38231	3.84991	0.303674	3.50982	0.911663	1709.5	52.705	1709.01	31.8388	1708.39	29.116	1708.39	29.116	100.065
CB4-38	83.9836	62399.4	1.4993	9.53078	1.12412	4.28604	2.24084	0.296267	1.93849	0.86507	1672.77	28.561	1690.68	18.4508	1712.95	20.6749	1712.95	20.6749	97.6544
CB4-104	332.446	105367	3.32009	9.37295	0.481728	4.54782	7.73713	0.309156	7.72212	0.99806	1736.55	117.568	1739.76	64.4873	1743.6	8.82475	1743.6	8.82475	99.5957
CB4-59	218.121	192277	5.90774	9.35147	0.713684	4.53693	2.06289	0.307709	1.9355	0.938248	1729.43	29.3592	1737.77	17.1648	1747.81	13.068	1747.81	13.068	98.9483
CB4-98	773.053	254477	6.02501	9.21007	0.318135	4.68956	2.50088	0.313252	2.48057	0.991876	1756.69	38.1434	1765.38	20.9333	1775.66	5.80404	1775.66	5.80404	98.9316
CB4-23	21.9307	26946.9	1.75537	8.21051	3.09921	6.12954	5.38373	0.365003	4.40222	0.817688	2005.84	75.8879	1994.46	47.0316	1982.67	55.1788	1982.67	55.1788	101.169
CB4-33	260.628	32751.7	1.91282	8.20392	0.430996	5.89582	1.37779	0.350804	1.30864	0.949813	1938.44	21.9085	1960.62	11.9616	1984.1	7.67121	1984.1	7.67121	97.6983
CB4-37	196.884	196857	0.711104	4.86466	0.373614	16.0012	2.11346	0.564552	2.08017	0.984251	2885.41	48.3882	2876.87	20.2001	2870.88	6.07427	2870.88	6.07427	100.506
